# Additive Dose Response Models: Defining Synergy

Simone Lederer<sup>1</sup>, Tjeerd M.H. Dijkstra<sup>2,3</sup>, and Tom Heskes<sup>1</sup>

<sup>1</sup>Data Science, Institute for Computing and Intelligent Systems, Radboud University, Postbus 9010, 6500 GL Nijmegen, The Netherlands

<sup>2</sup>Max Planck Institute for Developmental Biology, Max-Planck-Ring 1, 72076 Tübingen, Germany

<sup>3</sup>Center for Integrative Neuroscience, University Clinic Tübingen, Otfried-Müller-Str. 25, 72076 Tübingen, Germany

July 31, 2019

## Abstract

*In synergy studies, one focuses on compound combinations that promise a synergistic or antagonistic effect. With the help of high-throughput techniques, a huge amount of compound combinations can be screened and filtered for suitable candidates for a more detailed analysis. Those promising candidates are chosen based on the deviance between a measured response and an expected non-interactive response. A non-interactive response is based on a principle of no interaction, such as Loewe Additivity [Loewe, 1928] or Bliss Independence [Bliss, 1939]. In Lederer et al. [2018a], an explicit formulation of the hitherto implicitly defined Loewe Additivity has been introduced, the so-called Explicit Mean Equation. In the current study we show that this Explicit Mean Equation outperforms the original implicit formulation of Loewe Additivity and Bliss Independence when measuring synergy in terms of the deviance between measured and expected response. Further, we show that a deviance based computation of synergy outperforms a parametric approach. We show this on two datasets of compound combinations that are categorized into synergistic, non-interactive and antagonistic [Yadav et al., 2015, Cokol et al., 2011].*

**Keywords:** *synergy, Loewe Additivity, Bliss Independence, dose equivalence, Combination Index, General Isobole Equation, Explicit Mean Equation, Hill curve, null reference model, response surface, lack-of-fit*

## 1 Introduction

When combining a substance with other substances, one is generally interested in interaction effects. Those interaction effects are usually described as synergistic or antagonistic, dependent on whether the interaction is positive, resulting

26 in greater effects than expected, or negative, resulting in smaller effects than  
27 expected. From data generated with high-throughput techniques, one is con-  
28 fronted with massive compound interaction screens. From those screens, one  
29 needs to filter for interesting candidates that exhibit an interaction effect. To  
30 quickly scan all interactions, a simple measure is needed. Based on that pre-  
31 processing scan, those filtered combination candidates can then be examined in  
32 greater detail.

33 To determine whether a combination of substances exhibits an interaction  
34 effect, it is crucial to determine a non-interactive effect. Only when deviance  
35 from that so-called null reference is observed, can one speak of an interactive  
36 effect [Lederer et al., 2018a]. Over the last century, many principles of non-  
37 interaction have been introduced. For an extensive overview, refer to [Greco  
38 et al., 1995, Geary, 2012]. Two main principles for non-interactivity have sur-  
39 vived the critics: Loewe Additivity [Loewe, 1928] and Bliss Independence [Bliss,  
40 1939]. The popularity of Loewe Additivity is based on its principle of sham com-  
41 bination which assumes no interaction when a compound is combined with itself.  
42 Other null reference models do not hold that assumption. An alternative is Bliss  
43 Independence, which assumes (statistical) independence between the combined  
44 compounds.

45 Independent of the indecisive opinions about the null reference, there are  
46 multiple proposals how synergy can be measured given a null reference model.  
47 Some suggest to measure synergy as the difference between an observed isobole  
48 and a reference isobole calculated from a null-reference model. An isobole is  
49 the set of all dose combinations of the compounds that reach the same fixed  
50 effect, such as 50% of the maximal effect [Minto et al., 2000, Chou and Talalay,  
51 1984]. Another way to quantify synergy on the basis of the isobole is to look at  
52 the curvature and arc-length of the longest isobole spanned over the measured  
53 response [Cokol et al., 2011]. As the deviation from an isobole is measured for a  
54 fixed effect or dose ratio, synergy is only measured locally along that fixed effect  
55 or dose ratio. In order to not miss any effects, this method has to be applied  
56 for as many dose ratios possible.

57 In this paper we measure synergy as the deviation over the entire response  
58 surface. One way to do so is the Combeneft method by measuring synergy  
59 in terms of volume between the expected and measured effect [Di Veroli et al.,  
60 2016]. We will refer to it as a lack-of-fit method as it quantifies the lack of fit from  
61 the measured data to the null reference model. Another way of capturing the  
62 global variation is by introducing a synergy parameter  $\alpha$  into the mathematical  
63 formulation of the response surface. This parameter  $\alpha$  is fitted by minimizing  
64 the error between the measured effect and the  $\alpha$ -dependent response surface.  
65 Such statistical definition of synergy allows for statistical testing of significance  
66 of the synergy parameter. Fitting a synergy parameter to the data as in the  
67 parametric approaches tends to be computationally more complex than comput-  
68 ing the difference between the raw data and the null model as in the lack-of-fit  
69 approaches.

70 There is an increase in theoretical approaches to synergy, such as the re-  
71 cently re-discovered Hand model [Hand, 2000, Sinzger et al., 2019], which is  
72 a formulation of Loewe Additivity in form of a differential expression, or new  
73 ways of defining and measuring synergy, such as the ZIP model [Yadav et al.,  
74 2015], SynergyFinder [He and Tang, 2016], MuSyC [Meyer et al., 2019] and the  
75 copula model [Lambert and Dawson, 2019]. It would be a large effort to com-

pare these recent approaches with ours. An extensive comparison of the models has recently been made in Meyer et al. [2019]. Hence we focus on the two main principles, Loewe Additivity and Bliss Independence.

As the research area of synergy evolved from different disciplines, different terminologies are in common use. Whilst in pharmacology, one refers to the Loewe model, in toxicology, the same principle is called concentration addition. The response can be measured among others in growth rate, survival, or death. It is usually referred to as the measured or phenotype effect or as cell survival. In this study we interchange the terms response and effect.

When measuring a compound combination, one also measures each agent individually. The dose or concentration is typically some biological compound per unit of weight when using animal or plant models or per unit of volume when using a cell-based assay. However, it can also be an agent of a different type for example a dose of radiation as used in modern combination therapies for cancer [Nat, 2018]. This individual response is called mono-therapeutic response [Di Veroli et al., 2016] or single compound effect. We prefer a more statistical terminology and refer to it as conditional response or conditional effect. With record we refer to all measurements taken of one cell line or organism which is exposed to all combinations of two compounds. In other literature, this is referred to as response matrix [Lehar et al., 2007, Yadav et al., 2015].

In Section 2.1, we give a short introduction to the two null response principles, Loewe Additivity and Bliss Independence. We explain in detail several null reference models that build on those principles. We introduce synergy as any effect different from an interaction free model in Section 2.2. There, we also introduce the parametrized and deviance based synergy approaches. In Section 2.3, we introduce two datasets that come with a categorization into synergistic, non-interactive and antagonistic. We evaluate the models and methods in Section 3 together with a detailed comparison of the synergy scores.

## 2 Materials and Methods

### 2.1 Theory

Before one can decide whether a compound combination exhibits a synergistic effect, one needs to decide on the expected effect assuming no interaction between the compounds. Such so-called null reference models are constructed from the conditional (mono-therapeutic) dose-response curves of each of the compounds, which we denote by  $f_j(x_j)$  for  $j \in \{1, 2\}$ . Null reference models extend the conditional dose-response curves to a (null-reference) surface spanned between the two conditional responses. We denote the surface as  $f(x_1, x_2)$  such that

$$f(x_1, 0) = f_1(x_1) \tag{1}$$

and

$$f(0, x_2) = f_2(x_2). \tag{2}$$

Thus, the conditional response curves are the boundary conditions of the null reference surface. For this study, we focus on Hill curves to model the conditional dose-responses. More detailed information can be found in Appendix A.

### 119 2.1.1 Loewe Additivity

120 Loewe Additivity builds on the concepts of sham combination and dose equiv-  
121 alence. The first concept is the idea that a compound does not interact with  
122 itself. The latter concept assumes that both compounds that reach the same  
123 effect can be interchanged. Therefore, any linear combination of fractions of  
124 those doses which reach the effect individually and, summed up, are equal to  
125 one, yields that exact same effect. Mathematically speaking, if dose  $x_1^*$  from the  
126 first compound reaches the same effect as dose  $x_2^*$  from the second compound,  
127 then any dose combination  $(x_1, x_2)$ , for which

$$128 \quad \frac{x_1}{x_1^*} + \frac{x_2}{x_2^*} = 1 \quad (3)$$

129 holds, should yield the same effect as  $x_1^*$  and  $x_2^*$ . As this idea can be generalized  
130 to any effect  $y$ , one gets

$$131 \quad \frac{x_1}{f_1^{-1}(y)} + \frac{x_2}{f_2^{-1}(y)} = 1, \quad (4)$$

132 where  $x_1^*$  and  $x_2^*$  are replaced with  $f_1^{-1}(y)$  and  $f_2^{-1}(y)$ , the inverse functions  
133 of Hill curves, respectively. For a fixed effect  $y$ , Eq. 4 defines an isobole, which  
134 is in mathematical terms a contour line. Hence the name of this model: the  
135 General Isobole Equation. It is an implicit formulation as the effect  $y$  of a dose  
136 combination  $(x_1, x_2)$  is implicitly given in Eq. 4. In the following we use the  
137 mathematical notation for the General Isobole Equation  $f_{GI}(x_1, x_2) = y$  with  
138  $y$  being the solution to Eq. 4.

139 It was shown by Lederer et al. [2018a] that the principle of Loewe Additivity  
140 is based on a so-called Loewe Additivity Consistency Condition (LACC). This  
141 condition is that it should not matter whether equivalent doses of two com-  
142 pounds are expressed in terms of the first or the second. Under the assumption  
143 of the LACC being valid, Lederer et al. [2018a] have shown, that a null reference  
144 model can be formulated explicitly, by expressing the doses of one compound in  
145 terms of the other compound:

$$146 \quad f_{2 \rightarrow 1}(x_1, x_2) = f_1(x_1 + f_1^{-1}(f_2(x_2))) \quad (5)$$

$$147 \quad f_{1 \rightarrow 2}(x_1, x_2) = f_2(f_2^{-1}(f_1(x_1)) + x_2), \quad (6)$$

149 where  $f_1^{-1}(f_2(x_2))$  is the dose  $x_1$  of compound one to reach the same effect of  
150 compound two with dose  $x_2$  (see Fig. 7 in Appendix A). For a detailed expla-  
151 nation, refer to Lederer et al. [2018a]. Summing up this dose equivalent of the  
152 first compound with the dose of the first compound allows for the computation  
153 of the expected effect of the compound combination. With the two formulations  
154 above, the effect  $y$  of the dose combination  $(x_1, x_2)$  is expressed as the effect  
155 of either one compound to reach that same effect. Under the LACC, all three  
156 models, Eq. 4, Eq. 5 and Eq. 6 are equivalent. It was further shown, that, in  
157 order for the LACC to hold, conditional dose-response curves must be propor-  
158 tional to each other, i.e. being parallel shifted on the  $x$ -axis in log-space. It  
159 has been commented by Geary [2012] and shown in [Lederer et al., 2018a], that  
160 this consistency condition is often violated. In an effort to take advantage of  
161 the explicit formulation and to counteract the different behavior of Eq. 5 and  
162 Eq. 6 in case of a violated LACC, Lederer et al. [2018a] introduced the so-called

Explicit Mean Equation as mean of the two explicit formulations of Eq. 5 and Eq. 6: 163

$$f_{\text{mean}}(x_1, x_2) = 1/2 (f_{2 \rightarrow 1}(x_1, x_2) + f_{1 \rightarrow 2}(x_1, x_2)). \quad (7) \quad 164, 165$$

A more extensive overview of Loewe Additivity and definition of null reference models together with visualizations can be found in Lederer et al. [2018a]. 166, 167

### 2.1.2 Bliss Independence 168

Bliss Independence assumes independent sites of action of the two compounds and was introduced a decade later than Loewe Additivity in [Bliss, 1939]. Note that the formulation of Bliss Independence depends on the measurement of the effect. The best known formulation of Bliss Independence is based on monotonically increasing responses for increasing doses: 169, 170, 171, 172, 173

$$g_{\text{bliss}}(x_1, x_2) = g_1(x_1) + g_2(x_2) - g_1(x_1)g_2(x_2), \quad (8) \quad 174$$

where  $g_i(x_i) = 1 - f_i(x_i)$  is a conditional response curve with increasing effect for increasing doses. In case the effect is measured in percent, i.e.  $y \in [0, 100]$ , the interaction term needs to be divided by 100 to ensure the right dimensionality of the term. 175, 176, 177, 178

Here, we measure the effect in terms of cell survival or growth inhibition. Therefore the conditional response curves are monotonically decreasing for increasing concentrations or doses. 179, 180, 181

$$f_{\text{bliss}}(x_1, x_2) = f_1(x_1) f_2(x_2). \quad (9) \quad 182$$

The records are normalized to the response at  $x_1 = 0, x_2 = 0$ , thus  $f_1(0) = f_2(0) = 1$ . To arrive from Eq. 8 to Eq. 9, one replaces any  $g$  by  $1 - f$ . Chou and Talalay [1984] derive the Bliss Independence from a first order Michaelis-Menten kinetic system with mutually non-exclusive inhibitors. 183, 184, 185, 186

## 2.2 Methods 187

The models introduced in the previous section are null reference models in that they predict a response surface in the absence of compound interaction. We capture synergy in a single parameter to facilitate the screening process. This is different from other approaches, such as Chou and Talalay [1977], who measure synergy as deviation from a null-reference isobole without summarizing the deviation in a single parameter. The single parameter value is typically referred to as synergy- or  $\alpha$ -score [Berenbaum, 1977]. As we investigate two methods to quantify synergy, we introduce two synergy parameters  $\alpha$  and  $\gamma$ , which measure the extent of synergy. Both synergy scores  $\alpha$  and  $\gamma$  are parametrized such that  $\alpha = 0$  or  $\gamma = 0$  denote absence of an interaction effect. In case  $\alpha$  or  $\gamma$  take a value different from zero, we speak of a non-additive, or interactive effect. A compound combination is, dependent on the sign of synergy parameter, one of the three following: 188, 189, 190, 191, 192, 193, 194, 195, 196, 197, 198, 199, 200

$$\alpha, \gamma \begin{cases} > 0 & \text{synergistic} \\ = 0 & \text{additive or non-interactive} \\ < 0 & \text{antagonistic} \end{cases} \quad (10) \quad 201$$

202 Here, we measure synergy in two different ways, namely in fitting parametrized  
203 models or computing the lack-of-fit. The first method fits null reference models  
204 that are extended with a synergy parameter  $\alpha$ . For these parametrized models  $\alpha$   
205 is computed by minimizing the square deviation between the measured response  
206 and the response spanned by the  $\alpha$ -dependent model. For the second method  
207 the difference between a null reference model and the data is computed. For this  
208 method, the synergy score  $\gamma$  is defined as the volume that is spanned between  
209 the null reference model and the measured response.

210 Just as the conditional responses form the boundary condition for the null-  
211 reference surface (Eq. 1, Eq. 2), we want the conditional responses to be the  
212 boundary condition for all values of  $\alpha$ . Explicitly, assuming a synergy model  
213 dependent on  $\alpha$  is denoted by  $f(x_1, x_2|\alpha)$ , then

$$214 \left. \begin{aligned} f(x_1, 0|\alpha) &= f_1(x_1) \\ f(0, x_2|\alpha) &= f_2(x_2) \end{aligned} \right\} \forall \alpha, \quad (11)$$

215  
216 with  $f_i$  denoting the conditional response of compound  $i$ . We refer to Eq. 11 as  
217 the Synergy Desideratum. As we will see below, not all synergy models fulfill  
218 this property.

### 219 2.2.1 Parametrized Synergy

220 We extend the null reference models introduced in Section 2.1 in Eq. 4 - Eq. 9 to  
221 parametrized synergy models. The extension of the General Isobole Equation  
222 is the popular Combination Index introduced by Berenbaum [1977] and Chou  
223 and Talalay [1984]:

$$224 \frac{x_1}{f_1^{-1}(y)} + \frac{x_2}{f_2^{-1}(y)} = 1 - \alpha. \quad (12)$$

225 Berenbaum originally equated the left-hand side of Eq. 4 to the so-called Com-  
226 bination Index  $I$ . Depending on  $I$  smaller, larger, or equal to 1, synergy, antag-  
227 onism or non-interaction is indicated. For consistency with the other synergy  
228 models, we set  $I = 1 - \alpha$  such that  $\alpha$  matches the outcomes as listed in Eq. 10.  
229 In Section 3 we will refer to this implicit model as  $f_{\text{CI}}(x_1, x_2|\alpha)$ , where  $\alpha$  is the  
230 parameter that minimizes the squared error between measured data and Eq. 12.

231 Note that this model violates the Synergy Desideratum in Eq. 11 as  $\alpha$  not  
232 zero leads to deviations from the conditional responses. Explicitly,  $f_{\text{CI}}(x_1, 0|\alpha) =$   
233  $f_1((1 - \alpha)x_1) \neq f_1(x_1)$ . Although the Combination Index model violates the  
234 Synergy Desideratum, in practice it performs quite well and is in widespread  
235 use.

236 The explicit formulations in Eq. 5 and Eq. 6 are equivalent to the General  
237 Isobole Equation,  $f_{\text{GI}}(x_1, x_2)$ , given in Eq. 4, under the LACC [Lederer et al.,  
238 2018a], but different if the conditional responses are not proportional. The two  
239 explicit equations are in fact an extension of the ‘cooperative effect synergy’  
240 proposed by Geary [2012] for compounds with qualitatively similar effects. For  
241 these explicit formulations in Eq. 5 and Eq. 6 we propose a model that captures  
242 the interaction based on the explicit formulations:

$$243 f_{2 \rightarrow 1}(x_1, x_2|\alpha) = f_1(x_1 + (1 + \alpha)f_1^{-1}(f_2(x_2))) \quad (13)$$

$$244 f_{1 \rightarrow 2}(x_1, x_2|\alpha) = f_2((1 + \alpha)f_2^{-1}(f_1(x_1)) + x_2). \quad (14)$$

With this, we can extend the Explicit Mean Equation model  $f_{\text{mean}}(x_1, x_2)$  in Eq. 7 to a parametrized synergy model:

$$f_{\text{mean}}(x_1, x_2|\alpha) = 1/2(f_{2 \rightarrow 1}(x_1, x_2|\alpha) + f_{1 \rightarrow 2}(x_1, x_2|\alpha)), \quad (15)$$

which we refer to as  $f_{\text{mean}}(x_1, x_2|\alpha)$ . As  $f_{2 \rightarrow 1}(x_1, x_2|\alpha)$  and  $f_{1 \rightarrow 2}(x_1, x_2|\alpha)$  do not fulfill the Synergy Desideratum,  $f_{\text{mean}}(x_1, x_2|\alpha)$  also does not fulfill it.

To investigate the difference between the two models  $f_{2 \rightarrow 1}(x_1, x_2)$  (Eq. 5) and  $f_{1 \rightarrow 2}(x_1, x_2)$  (Eq. 6) we treat compound one and two based on the difference in slopes in the conditional responses (for more detailed information on the different parameters in Hill curves, refer to Appendix A). Instead of speaking of the first and second compound, we speak of the smaller and larger one, referring to the order of steepness. Therefore, we use models Eq. 13 and Eq. 14, but categorize the compounds based on the slope parameter of their conditional response curves. This results in  $f_{\text{large} \rightarrow \text{small}}(x_1, x_2|\alpha)$  and  $f_{\text{small} \rightarrow \text{large}}(x_1, x_2|\alpha)$ .

Another synergy model we introduce here and refer to as  $f_{\text{geary}}(x_1, x_2|\alpha)$  is based on a comment of Geary [2012], hence the naming. The two explicit models  $f_{2 \rightarrow 1}(x_1, x_2)$  and  $f_{1 \rightarrow 2}(x_1, x_2)$  yield the same surface under the LACC but do rarely in practice. Therefore, it cannot be determined whether a response that lies between the two surfaces is synergistic or antagonistic and hence should be treated as non-interactive. Thus, if  $\alpha$  from  $f_{1 \rightarrow 2}(x_1, x_2|\alpha)$  and  $\alpha$  from  $f_{2 \rightarrow 1}(x_1, x_2|\alpha)$  are of equal sign, the synergy score of that model is computed as the mean of those two parameters. In case the two synergy parameters are of opposite sign, the synergy score is set to 0:

$$\alpha_{\text{geary}} = \begin{cases} \frac{1}{2}(\alpha_{1 \rightarrow 2} + \alpha_{2 \rightarrow 1}) & \text{if } \text{sign}(\alpha_{1 \rightarrow 2}) = \text{sign}(\alpha_{2 \rightarrow 1}) \\ 0 & \text{else} \end{cases}. \quad (16)$$

Next, to extend the null reference model following the principle of Bliss Independence, we extend Eq. 8 to

$$g_{\text{bliss}}(x_1, x_2|\alpha) = g_1(x_1) + g_2(x_2) - (1 + \alpha)g_1(x_1)g_2(x_2). \quad (17)$$

The motivation for this model is that any interaction between the two compounds is caught in the interaction term of the two conditional responses. In case of no interaction, the synergy parameter  $\alpha = 0$ , which leads to  $(1 + \alpha) = 1$ , and results in no deviance from the null reference model. As we use the formulation of Eq. 9 due to measuring the effect as survival, we reformulate Eq. 17 analogously as we did to get from Eq. 8 to Eq. 9: by replacing  $g_i(x_i)$  with  $1 - f_i(x_i)$ . Hence, Eq. 17 takes the form:

$$f_{\text{bliss}}(x_1, x_2|\alpha) = f_1(x_1)f_2(x_2) + \alpha(1 - f_1(x_1))(1 - f_2(x_2)) \quad (18)$$

This model does satisfy the requirement of no influence of the synergy parameter on conditional doses:  $f_{\text{bliss}}(x_1, 0|\alpha) = f_1(x_1)$  and  $f_{\text{bliss}}(0, x_2|\alpha) = f_2(x_2)$  as  $f_i(0) = 1$ . In case of synergy, the interactive effect is expected to be larger, therefore,  $\alpha$  being positive. If the compound combination has an antagonistic effect, the interaction term is expected to be negative. For extreme  $\alpha$ , the parametric approach leads to responses outside of the range  $0 \leq y \leq 1$ , e.g.  $f_{\text{bliss}}(x_1, x_2) \rightarrow -\infty$  if  $\alpha \rightarrow -\infty$ . The same holds for the formulations of Loewe Additivity. The implicit formulation becomes impossible to match and for the

288 explicit formulations, the dose expression within brackets of  $f_{2 \rightarrow 1}(x_1, x_2|\alpha)$  be-  
289 comes negative. Additionally,  $\alpha > 1$  is not possible for  $f_{CI}(x_1, x_2|\alpha)$ , as the left-  
290 hand side of Eq. 12 can not be negative. Such behavior is also known from other  
291 models, e.g. for the Greco flagship model for negative synergy scores [Greco  
292 et al., 1995, p. 365-366, and Fig. 26]. Hence, we will limit  $\alpha$  to the range of  $-1$   
293 to  $1$ .

294 Despite of the Synergy Desideratum being violated for the models that build  
295 up on the Loewe Additivity principle, there is no further effect on the model  
296 comparison presented in Section 3 as conditional doses are excluded when com-  
297 puting the synergy score (see Section 2.2.2 and Section 2.2.3).

### 298 2.2.2 Lack-of-Fit Synergy

299 The second method to measure synergy investigated here is to compute the lack-  
300 of-fit of the measured response of a combination of compounds to the response  
301 of a null reference model derived from the conditional responses. We refer to  
302 this synergy value as  $\gamma$ :

$$303 \quad \gamma = \int_{\min(x_2 > 0)}^{\max(x_2)} \int_{\min(x_1 > 0)}^{\max(x_1)} (\hat{y}(x_1, x_2|\Theta) - y(x_1, x_2)) d \log(x_1) d \log(x_2), \quad (19)$$

304 with  $\hat{y}(x_1, x_2|\Theta)$  the estimated effect with parameters  $\Theta$  of the fitted conditional  
305 responses following any non-interactive model and  $y$  the measured effect. Note  
306 that  $\hat{y}(\Theta)$  and  $y$  are dependent on the concentration combination  $(x_1, x_2)$ . This  
307 method was used in the AstraZeneca DREAM challenge [Menden et al., 2018]  
308 with the General Isobole Equation as null reference model and can be found  
309 in [Di Veroli et al., 2016]. Computing the volume has the advantage of taking  
310 the experimental design into account in contrast to simply taking the mean  
311 deviance over all measurement points, which is independent of the relative po-  
312 sitions of the measurements. We also used a synergy value calculated from the  
313 mean deviance and it clearly performed worse (data not shown). The synergy  
314 value varies for different dose transformations. For example, the computed null-  
315 reference surface (and hence the synergy value) will be different for the same  
316 experiment if a log-transformation is applied to the doses or not.

317 In all, we have introduced six null reference models, five of them building  
318 up on the concept of Loewe Additivity and one on Bliss Independence. We  
319 further have introduced two methods to compute synergy, the parametric one  
320 and the lack-of-fit method, where both synergy parameters  $\alpha$  and  $\gamma$  are positive  
321 if the record is synergistic, negative, if antagonistic. This results in twelve syn-  
322 ergy model-method combinations: the parametric ones,  $f_{CI}(x_1, x_2|\alpha)$  (Eq. 12),  
323  $f_{\text{large} \rightarrow \text{small}}(x_1, x_2|\alpha)$  and  $f_{\text{small} \rightarrow \text{large}}(x_1, x_2|\alpha)$  (Eq. 13, Eq. 14, dependent on  
324 the slope parameters) together with their mean,  $f_{\text{mean}}(x_1, x_2|\alpha)$  (Eq. 15), the  
325 method of Geary and  $f_{\text{bliss}}(x_1, x_2|\alpha)$  (Eq. 17). For the lack-of-fit method,  
326 we take as the null reference:  $f_{CI}(x_1, x_2)$  (Eq. 4),  $f_{\text{large} \rightarrow \text{small}}(x_1, x_2)$  and  
327  $f_{\text{small} \rightarrow \text{large}}(x_1, x_2)$  (Eq. 5, Eq. 6), with the Explicit Mean Equation,  $f_{\text{mean}}(x_1, x_2)$   
328 (Eq. 7), the method of Geary (analogously to Eq. 16) and  $f_{\text{bliss}}(x_1, x_2)$  (Eq. 9).



### 2.2.3 Fitting the Synergy Parameter

Before applying the two methods presented in Section 2.2.1 and Section 2.2.2, we normalize and clean the data from outliers. In a first step we normalize all records to the same value,  $y_0$ , the measured response at zero dose concentration from both compounds. Second, we discard outliers using the deviation from a spline approximation. Third, we fit both conditional responses of each record, namely the responses of each compound individually, to a pair of Hill curves (Eq. 21, Appendix A). We fit the response at zero dose concentration for both Hill curves. This gives the parameter set  $\Theta = \{y_0, y_{\infty,1}, y_{\infty,2}, e_1, e_2, s_1, s_2\}$  for each record. More details are given in Appendix B.

We apply the two different methods to calculate the synergy parameters  $\alpha$  and  $\gamma$  to each record. First, for the parametrized synergy models, we apply a grid search for  $\alpha$ , for  $\alpha \in [-1, 1]$  with a step size of 0.01, minimizing the sum of squared errors. This gives the value of  $\alpha$  for which the squared error between the  $i^{\text{th}}$  measured effect  $y^{(i)}$  and  $i^{\text{th}}$  expected effect  $\hat{y}(x_1^{(i)}, x_2^{(i)} | \alpha, \Theta)$  is minimal:

$$\min_{\alpha} \sum_{i=1, \text{ with } x_1^{(i)} \neq 0 \text{ and } x_2^{(i)} \neq 0}^N \left( \hat{y}(x_1^{(i)}, x_2^{(i)} | \alpha, \Theta) - y^{(i)} \right)^2. \quad (20)$$

Note that we exclude the conditional responses that we used to fit  $\Theta$  from the minimization. Second, we apply the lack-of-fit method from Di Veroli et al. [2016], where synergy is measured in terms of the integral difference in log space of measured response and surface spanned by the non-interactive models in Section 2.1, as given in Eq. 19. For the calculation of the integrals, we apply the trapezoidal rule [Press et al., 2007, Chapter 4]. In Fig. 1 we summarize the most important steps of the analysis for a synergistic example. In Appendix E, Fig. 11, the same is shown for an antagonistic record.

## 2.3 Material

To evaluate the two methods introduced in Section 2.2.1 and Section 2.2.2, we apply them to two datasets of compound combination screening for which a categorization into the three synergy cases is provided.

The Mathews Griner dataset is a cancer compound synergy study by Mathews Griner et al. [2014]. In a one-to-all experimental design, the compound ibrutinib was combined with 463 other compounds and administered to the cancer cell line TMD8 of which cell viability was measured. The dataset is published at <https://tripod.nih.gov/matrix-client/>. Each compound combination was measured for 5 different doses, decreasing from  $125\mu M$  to  $2.5\mu M$  in a four-fold dilution for each compound alongside their conditional effects, resulting in 36 different dose combinations. The categorization of this dataset comes from a study by Yadav et al. [2015], in which every record was categorized based on a visual inspection.

The Cokol dataset comes from a study about fungal cell growth of the yeast *S. cerevisiae* (strain By4741), where Cokol et al. [2011] categorized the dataset. In this study the influence on cell growth was measured when exposed to 33 different compounds that were combined with one another based on promising combinations chosen by the authors, resulting in 200 different drug-drug-cell combinations. With an individually measured maximal effect dose for every

374 compound, the doses administered decrease linearly in seven steps with the  
375 eight dose set to zero, resulting in an  $8 \times 8$  factorial design.

376 Based on the longest arc length of an isobole that is compared to the ex-  
377 pected longest linear isobole in a non-interactive scenario, where Loewe Additiv-  
378 ity serves as null reference model, each record was given a score. In more detail,  
379 from the estimated surface of a record assuming no interaction, the longest con-  
380 tour line is measured in terms of its length and direction (convex or concave).  
381 A convex contour line leads to the categorization of a record as synergistic and  
382 the arc length of the longest contour line determines the strength of synergy. A  
383 concave contour line results in an antagonistic categorization with its extent be-  
384 ing measured again as the length of the longest isobole. Thus the Cokol dataset  
385 not only comes with a classification but also with a synergy score similar to  $\alpha$   
386 or  $\gamma$ .

387 To our knowledge, these two datasets are the only high-throughput ones  
388 with a classification into the three synergy classes: antagonistic, non-interactive  
389 and synergistic. Both datasets are somewhat imbalanced because interactions  
390 are rare [Borisov et al., 2003, Zhang et al., 2007, Farha and Brown, 2010]. The  
391 distribution of the classification is listed in Table 1. We obtained both cate-  
392 gorizations after personal communication with the authors Yadav et al. [2015]  
393 and Cokol et al. [2011]. For the purpose of comparing the synergy models, we  
394 consider these two classifications as ground truth.

## 395 **3 Results**

396 Using the two methods of computing the synergy score, the parametric one  
397 (Section 2.2.1) and the lack-of-fit one (Section 2.2.2), we compute synergy scores  
398 for all records of the two datasets introduced in Section 2.3.

### 399 **3.1 Kendall rank correlation coefficient**

400 Having computed the synergy scores  $\alpha$  and  $\gamma$  from the two different methods as  
401 described in Section 2.2.3, we compute the Kendall rank correlation coefficient,  
402 which is also known as Kendall's tau coefficient and was originally proposed  
403 by Kendall [1938]. This coefficient computes the rank correlation between the  
404 data as originally categorized by Yadav et al. [2015] and Cokol et al. [2011]  
405 and the computed synergy scores resulting from the two methods introduced in  
406 Section 2.2.1 and Section 2.2.2. For the analysis, we rank synergistic records  
407 highest at rank 3, followed by non-interactive at rank 2 and antagonistic lowest  
408 at rank 1. Due to the many ties in rank, the Kendall rank correlation coefficient  
409 cannot take a value higher than 0.75 for Mathews Griner and 0.8 for Cokol,  
410 even if a perfect ranking was given. An overview of the Kendall rank correlation  
411 coefficients is given in Table 3 and Table 4 in Appendix D.

412 To compare the parametric and lack-of-fit methods, we plot the correlation  
413 values as a scatter plot per method (see Fig. 2) with the values from the para-  
414 metric method plotted on the  $x$ -axis and those from the lack-of-fit method on  
415 the  $y$ -axis. Most of the points scatter in the upper left triangle, above the  
416 diagonal line. This shows that the lack-of-fit method outperforms the paramet-  
417 ric method. This holds for all models applied to the Mathews Griner dataset  
418 and also for all models but  $f_{\text{geary}}(x_1, x_2|\alpha)$  and  $f_{\text{small} \rightarrow \text{large}}(x_1, x_2|\alpha)$  applied

to the Cokol dataset. For both datasets, the highest correlation scores result from those null reference models that are based on the Loewe Additivity principle. The Bliss null reference model performs worst for the Mathews Griner set for both methods. For the Cokol data it is the second worst model. To a certain extent this can be explained due to the classification of the Cokol dataset being based on the isobole length relative to non-interactive isoboles, which is a Loewe Additivity type analysis. As the categorization of the Mathews Griner dataset is based on visual inspection, we cannot explain the bad performance of  $f_{\text{bliss}}(x_1, x_2)$  for that dataset. On both datasets,  $f_{\text{GI}}(x_1, x_2)$ ,  $f_{\text{large} \rightarrow \text{small}}(x_1, x_2)$  and  $f_{\text{mean}}(x_1, x_2)$  perform best for the lack-of-fit method. For the Mathews Griner dataset,  $f_{\text{large} \rightarrow \text{small}}(x_1, x_2)$  dominates marginally over the General Isobole Equation and Explicit Mean Equation model. For the Cokol dataset, the Explicit Mean Equation dominates for both methods.

### 3.2 Scattering of Synergy Scores

To further investigate the performance of the methods and null reference models, we plot the synergy scores of the best performing models based on the Kendall rank correlation coefficient analysis (Section 3.1, and an ROC analysis, which we describe in detail in Appendix C) for both datasets in Fig. 3, Fig. 4 and Fig. 5. In all figures, the overall correlation of the compared data is depicted together with the correlation per categorization. The coloring of the scores is based on the original categorization as antagonistic, non-interactive or synergistic as provided by Yadav et al. [2015] and Cokol et al. [2011].

In Fig. 3 the synergy scores computed with the lack-of-fit method are plotted against the original synergy scores from Cokol et al. [2011]. Applying the lack-of-fit method to the Bliss Independence model (Eq. 9) results in scores which are mainly above zero (Fig. 3, upper left). Further, it can be seen in the density plots along the  $y$ -axis in Fig. 3, upper left panel, and on the  $x$ -axis of Fig. 4, both panels in the first row and left panel in the middle row, that the synergy scores that are computed based on the principle of Bliss Independence cannot be easily separated by categorization, making it difficult to come up with a threshold to categorize a record into one of the three synergy categories (synergy, antagonism, non-interaction) given a synergy score.

For the other three models depicted in Fig. 3, that are based on the principle of Loewe Additivity, the synergy scores are more clearly separated. The computed scores of the synergistic records distribute nicely above zero in the upper right corner (categorized as synergistic and computed synergy scores above zero) as well as they scatter in the lower left corner for antagonistic cases. In all those three panels in Fig. 3 we see for the non-interactive records that the computed scores of those three models are both positive and negative ranging roughly between  $-0.1$  and  $0.1$  symmetrically. Barely any of the computed synergy scores for antagonistic cases are positive. Therefore, the chances of a record being antagonistic if the synergy score is above zero are quite low as well as the risk of categorizing a record as antagonistic if it is synergistic.

We further looked in detail into dose combinations for which both the  $f_{\text{GI}}(x_1, x_2)$  and  $f_{\text{mean}}(x_1, x_2)$  yield positive synergy values for antagonistic cases and into dose combinations for which the  $f_{\text{mean}}(x_1, x_2)$  model results in negative synergy values for records which are labeled as synergistic. In total we found four dose combinations. A visualization of the observed and expected responses based on

467 the Explicit Mean Equation model is shown in Appendix E, Fig. 12. One of  
468 them is a compound combined with itself. Hence, per definition of the Loewe  
469 Additivity, no interaction is expected. From Fig. 12, one can see why this record  
470 was mis-categorized: for high dose combinations, a greater effect is found, which  
471 is not found for the conditional runs. Probably, the dose ranges are too small to  
472 show such effects. We looked at the conditional responses of the other three dose  
473 combinations and observed that for the originally antagonistic records (three out  
474 of four) one of the conditional responses exhibits small effects with the maximal  
475 response  $y_\infty$  being above 0.65 (comp. right panel of Fig. 6). That leads to the  
476 computed null-reference surface to be quite high and hence causes synergistic  
477 scores if any effects are measured that are smaller than  $\max(y_\infty^{(1)}, y_\infty^{(2)})$ . We  
478 suspect that the dose concentrations are not well-sampled and larger maximal  
479 doses should have been administered.

480 We further looked up the three dose combinations (excluding the one where  
481 the compound is combined with itself) in the Connectivity Map [Subramanian  
482 et al., 2017, Lamb et al., 2006], which is one of the largest repositories of drug  
483 response studies. Of those, we could find three in the Connectivity Map. All  
484 of these dose combinations showed non-interactive effects on all cell lines they  
485 were tested on. The assays found in the Connectivity Map are run on cancer  
486 cell lines. The dose combinations investigated here are run on yeast. Hence, a  
487 full comparison cannot be made, but results are certainly suggestive that the  
488 compound combinations are non-interactive.

489 In Fig. 4 and Fig. 5, the computed scores from different null reference mod-  
490 els are plotted against each other. We compare the implicit formulation (Gen-  
491 eral Isobole Equation) to the Bliss Independence model and the two best per-  
492 forming models that are based on the explicit formulation of Loewe Additivity,  
493  $f_{\text{mean}}(x_1, x_2)$  and  $f_{\text{large} \rightarrow \text{small}}(x_1, x_2)$ . The coloring of the scores is based on the  
494 original categorization as antagonistic, non-interactive or synergistic as provided  
495 by Yadav et al. [2015] and Cokol et al. [2011].

496 In Fig. 4 the scores from the Mathews Griner dataset are plotted. In the two  
497 panels in the upper row and the left panel in the middle row Bliss Independence  
498 is compared to the other three null models that build up on the principles of  
499 Loewe Additivity. It is obvious, that the scores based on Bliss Independence  
500 are larger than those of Loewe Additivity and mainly above zero. This is due to  
501 the more conservative null reference surface as derived from Bliss Independence  
502 (see [Sinzger et al., 2019, Fig. 6]). The scores from models that are based  
503 on Loewe Additivity are very similar to each other, as they scatter along the  
504 diagonal (panels in middle right and lower row). It is difficult, though, to tell  
505 apart whether a record is synergistic or antagonistic, as non-interactive records  
506 scatter largely between  $-0.5$  and  $0.5$ . Only records with a computed score  
507 outside that range can be categorized as interactive. For the Cokol dataset,  
508 which serves as basis for Fig. 5, the scores can be better separated. Despite the  
509 scores being generally smaller than those from the Mathews Griner data, the  
510 records can be easier separated, when using a Loewe Additivity based model.  
511 Additionally, we see here the similarity between these additive models given their  
512 strong correlation (right panels in middle row and both panels in lower row).  
513 Further, the scores based on  $f_{\text{large} \rightarrow \text{small}}(x_1, x_2)$  achieve higher values than those  
514 from the other two Loewe Additivity based models. This becomes obvious  
515 when comparing the null-reference surfaces of those three models, as depicted

in [Lederer et al., 2018a, Fig. 4]. The surface spanned by  $f_{\text{large} \rightarrow \text{small}}(x_1, x_2)$  spans a surface above those surfaces spanned by Explicit Mean Equation or General Isobole Equation. Therefore, in synergistic cases where the measured effect is greater, and hence the response in cell survival smaller, the difference from the null-reference surface to  $f_{\text{large} \rightarrow \text{small}}(x_1, x_2)$  is greater than to the other two models. We suspect the synergy models from the Cokol dataset to be better separable due to the experimental design of the dataset. All compounds were applied up to their known maximal effect dose. This was not the case for the Mathews Griner dataset, where all compounds were applied at the same fixed dose range.

All in all, the lack-of-fit method performs better for any model when applied to the Mathews Griner dataset and mostly better for the Cokol dataset, with the exception of the  $f_{\text{small} \rightarrow \text{large}}(x_1, x_2)$  and Geary model. We suggest, that the lack-of-fit should be preferred over the parametric method, due to the overall performance on both datasets. When using the lack-of-fit method, the Explicit Mean Equation model performs either second best (Mathews Griner dataset), or best (Cokol dataset). The other two well performing models, the explicit  $f_{\text{large} \rightarrow \text{small}}(x_1, x_2)$  or the original implicit formulation of Loewe Additivity, the General Isobole Equation, do not perform equally well on both datasets. To exclude any bias from these models for different datasets, the Explicit Mean Equation should be preferred.

## 4 Discussion

The rise of high-throughput methods in recent years allows for massive screening of compound combinations. With the increase of data, there is an urge to develop methods that allow for reliable filtering of promising combinations. Additionally, the recent success of a synergy study of in vivo mice by Grüner et al. [2016] underlines the fast development of possibilities to generate biological data. Therefore, it is all the more important to develop methods that are sound and easily applicable to high-throughput data.

In this study we use two datasets of compound combinations that come with a categorization into synergistic, non-interactive or antagonistic for each record.

Based on the fitted conditional responses, we compute the synergy scores of all records. We compare six models that build on the principles of Loewe Additivity and Bliss Independence. Those six models are used with two different methods to compute a synergy score for each record. The first method is a parametric approach and is motivated by the Combination Index introduced by Berenbaum [1977]. The second method quantifies the difference in volume between the expected response assuming no interaction and the measured response and is motivated by Di Veroli et al. [2016].

We compare the computed synergy scores from both methods, each applied with the six reference models, based on Kendall rank correlation coefficients. Based on these correlation coefficients we investigate the reconstruction of ranking of the records (see Section 3.1). We further conduct an ROC analysis (results shown in Appendix C). With this, we quantify the methods' and models' capacity to distinguish records from different categories, given a computed synergy score. Both, the Kendall rank correlation coefficient and the ROC analysis, show a superiority of those models that are based on Loewe Additivity relative

563 to those based on Bliss Independence. From those additive models the Explicit  
564 Mean Equation is the overall best performing model for both datasets.

565 For the above comparison of the six null reference models and the two meth-  
566 ods, we rely on the underlying categorization of both datasets. All performance  
567 metrics are based on how well the predicted synergy scores agree with the un-  
568 derlying categorization. The categorizations of both datasets were created very  
569 differently from one another. On one hand, the Mathews Griner dataset was  
570 categorized on a visual inspection, on account of which we cannot be certain  
571 about the assumptions made that guided the decision making process. On the  
572 other hand, the categorization of the Cokol dataset is based on the principle  
573 of Loewe Additivity. This leads to the natural preference of null models that  
574 are based on Loewe Additivity over those based on Bliss Independence, which  
575 we find back in our analysis. Irrespective of the origin of the classification, we  
576 stress that the labels were provided to us by independent researchers and hence  
577 were not biased in any way to favor the Explicit Mean Equation model.

578 Note that we conduct the research only on combinations of two compounds.  
579 Meanwhile, it is shown in Russ and Kishony [2018] that Bliss Independence  
580 maintains accuracy when increasing the number of compounds that are com-  
581 bined with each other. Loewe Additivity, however, loses its predictive power for  
582 an increasing number of compounds.

583 The comparison of the parametric method with the lack-of-fit method shows  
584 a superiority of the lack-of-fit method. To recall, the motivation behind the  
585 parametric approach was the statistical advantages of such an approach. It  
586 allows to define an interval around  $\alpha = 0$  in which a compound combination can  
587 be considered additive. For the lack-of-fit method, such statistical evaluation  
588 can not be done directly, but could be performed on the basis of bootstrapping.

589 Chou and Talalay [1977] measure the interaction effect locally for a fixed  
590 ratio of doses of both compounds that are supposed to reach the same effect,  
591 say one unit of the first compound causes the same effect as two units of the  
592 second compound, which results in the dose combination of 1:2. Along this fixed  
593 ratio of doses, they compute the left-hand side of Eq. 3 given the two doses  $x_1$   
594 and  $x_2$  that are assumed to reach a fixed effect  $y^*$  together with  $x_i^*$  being the  
595 dose of compound  $i$  that reaches the fixed effect alone. For the fixed dose ra-  
596 tio, they run over all expected effects, usually from zero to one. A geometric  
597 interpretation of that method is depicted in [Greco et al., 1995, Fig. 7, p. 341].  
598 The resulting values of the left-hand side of Eq. 3 are analyzed graphically: all  
599 computed values are plotted versus the expected fixed effect  $y^* = [0, 1]$ . Val-  
600 ues higher than one exhibit synergistic behavior, values below one antagonism.  
601 This method allows for results that show antagonistic behavior for, say, smaller  
602 effects, as well as synergistic behavior for higher effects, or vice versa. That such  
603 a behavior of switching from antagonistic behavior in one region to synergistic  
604 behavior in another can occur was also shown in Norberg and Wahlström [1988].  
605 With one synergy score, as used throughout this paper, we do not provide such  
606 a measure for local antagonism and synergism. Our main motivation in this  
607 study is to provide a single synergy score that allows for fast filtering of inter-  
608 esting candidates for more in-depth research. To extend that idea, the standard  
609 deviation could be taken into account, as in a  $t$ -value or  $Z$ -score. Additionally,  
610 the superior lack-of-fit method is much faster and simpler to implement than  
611 the parametric one.

612 Finally, to assess how distinguishable the synergy scores  $\gamma$  are, we visualize

the synergy scores based on the underlying category (Section 3.2). The synergy scores from the lack-of-fit method can, based on their sign, reliably be categorized as synergistic or antagonistic. For records categorized as non-interactive, the computed synergy scores are positive as well as negative. For the two datasets, we saw different extents of separation between those  $\gamma$ -scores, which makes it difficult to generalize the results. All in all, the differentiation from no interaction poses a more difficult task as choosing the threshold is arbitrary.

During the analysis, we observed higher synergy scores when applying the Bliss Independence principle as null reference model. This is due to the more conservative null reference surface as derived from Bliss Independence (see exemplary comparison of isoboles from most of the models discussed here in [Sinzger et al., 2019, Fig. 6]). Due to the synergy scores being relatively high, a differentiation between categories based on the synergy score poses a bigger challenge. There is a strong overlap of synergy scores from all three categories. Additionally, most of the synergy scores  $\gamma$ , that are computed with the lack-of-fit method, are above zero. Different ranges of synergy scores for both datasets make it additionally difficult to assess synergy or antagonism for a record based on the unique information of the synergy score.

We want to emphasize the performance benefit of the recently introduced Explicit Mean Equation [Lederer et al., 2018a] over the implicit formulation in form of the General Isobole Equation. On both datasets, it is the overall best performing model when compared to the provided categorizations. The explicit formulation of this additive model was shown to speed up computation by a factor of 250 (see [Lederer et al., 2018a, Fig. S1]). Together with the implementation of the lack-of-fit method, which is easier to implement and a lot faster than the parametric method, this combination of model improvement and method can be of great benefit for the research community.

Although the performance of models and methods are consistent across the two (quite different) datasets considered in this study, reliable comparison of different models and methods would benefit from the availability of drug screening datasets that are available with ground truth labeling.

## 644 Acknowledgments

645 We thank Bhagwan Yadav for the sharing of the code used for the analysis in  
646 Yadav et al. [2015] and Murat Cokol for the sharing of the data and analytical  
647 insights from Cokol et al. [2011].

648 An earlier version of this manuscript has been released as a Pre-Print at  
649 [Lederer et al., 2018b].

## 650 Conflict of Interest

651 The authors declare that they have no conflict of interest.

## 652 Funding

653 This work was supported by the Radboud University and CogIMon H2020 ICT-  
654 644727.

## 655 References

656 S Loewe. Die quantitativen Probleme der Pharmakologie. *Ergebnisse der Phys-*  
657 *iol.*, 27(1):47–187, 1928. ISSN 03034240. doi: 10.1007/BF02322290.

658 C I Bliss. The toxicity of poisons applied jointly. *Ann. Appl. Biol.*, 26(3):  
659 585–615, 1939. ISSN 00034746. doi: 10.1111/j.1744-7348.1939.tb06990.x.

660 Simone Lederer, Tjeerd M H Dijkstra, and Tom Heskes. Additive Dose Response  
661 Models: Explicit Formulation and the Loewe Additivity Consistency Condi-  
662 tion. *Front. Pharmacol.*, 9(February):1–11, 2018a. doi: 10.3389/fphar.2018.  
663 00031. URL [https://www.frontiersin.org/articles/10.3389/fphar.](https://www.frontiersin.org/articles/10.3389/fphar.2018.00031/full)  
664 2018.00031/full.

665 Bhagwan Yadav, Krister Wennerberg, Tero Aittokallio, and Jing Tang. Search-  
666 ing for Drug Synergy in Complex Dose-Response Landscapes Using an In-  
667 teraction Potency Model. *Comput. Struct. Biotechnol. J.*, 13:504–513, 2015.  
668 ISSN 20010370. doi: 10.1016/j.csbj.2015.09.001. URL [http://dx.doi.org/](http://dx.doi.org/10.1016/j.csbj.2015.09.001)  
669 10.1016/j.csbj.2015.09.001.

670 Murat Cokol, Hon Nian Chua, Murat Tasan, Beste Mutlu, Zohar B Wein-  
671 stein, Yo Suzuki, Mehmet E Nergiz, Michael Costanzo, Anastasia Barysh-  
672 nikova, Guri Giaever, Corey Nislow, Chad L Myers, Brenda J Andrews,  
673 Charles Boone, and Frederick P Roth. Systematic exploration of syner-  
674 gistic drug pairs. *Mol. Syst. Biol.*, 7(544), 2011. ISSN 1744-4292. doi:  
675 10.1038/msb.2011.71.

676 William R Greco, Gergory Bravo, and John C Parsons. The Search for Synergy:  
677 A Critical Review from A Response Surface Perspective. *Pharmacol. Rev.*,  
678 47(2):331–385, 1995.

679 Nori Geary. Understanding Synergy. *Am. J. Physiol. Endocrinol. Metab.*, 304  
680 (3):E237–E253, 2012. ISSN 1522-1555. doi: 10.1152/ajpendo.00308.2012.  
URL <http://www.ncbi.nlm.nih.gov/pubmed/23211518>.

681



- Charles F Minto, Thomas W Schnider, Timothy G Short, Keith M Gregg, Andrea Gentilini, and Steven L Shafer. Response Surface Model for Anesthetic Drug Interactions. *Anesthesiology*, 92(6):1603–1606, 2000. 682  
683  
684
- Ting-Chao Chou and Paul Talalay. Quantitative analysis of dose-effect relationships: the combined effects of multiple drugs or enzyme inhibitors. *Adv. Enzyme Regul.*, 22:27–55, 1984. doi: 10.1016/0065-2571(84)90007-4. 685  
686  
687
- Giovanni Y Di Veroli, Chiara Fornari, Dennis Wang, Severine Mollard, Jo L Bramhall, Frances M Richards, and Duncan I Jodrell. Combeneft: An interactive platform for the analysis and visualisation of drug combinations. *Bioinformatics*, 32(18):2866–2868, 2016. ISSN 1367-4803. doi: 10.1093/bioinformatics/btw230. URL <http://bioinformatics.oxfordjournals.org/content/early/2016/05/27/bioinformatics.btw230.full.pdf> }5Cn<http://bioinformatics.oxfordjournals.org/content/early/2016/04/25/bioinformatics.btw230.abstract>. 688  
689  
690  
691  
692  
693  
694  
695
- D. J. Hand. Synergy in drug combinations. In Wolfgang Gaul, Otto Opitz, and Martin Schader, editors, *Data Anal. Sci. Model. Pract. Appl.*, pages 471–475. Springer-Verlag, Berlin Heidelberg, 2000. ISBN 978-3-540-67731-4. 696  
697  
698
- Mark Sinzger, Jakob Vanhoefer, Carolin Loos, and Jan Hasenauer. Comparison of null models for combination drug therapy reveals Hand model as biochemically most plausible. *Sci. Rep.*, 9(3002):1–15, 2019. ISSN 2045-2322. doi: 10.1038/s41598-019-38907-x. URL <http://dx.doi.org/10.1038/s41598-019-38907-x>. 699  
700  
701  
702  
703
- Liye He and Jing Tang. *synergyfinder: Calculate and Visualize Synergy Scores for Drug Combinations*, 2016. URL <https://cran.r-project.org/package=synergyfinder>. 704  
705  
706
- Christian T Meyer, David J Wooten, B Bishal Paudel, Joshua Bauer, Keisha N Hardeman, David Westover, Christine M Lovly, Leonard A Harris, Darren R Tyson, and Vito Quaranta. Quantifying Drug Combination Synergy along Potency and Efficacy Axes. *Cell Syst.*, 8(2):97–108, 2019. ISSN 2405-4712. doi: 10.1016/j.cels.2019.01.003. URL <https://doi.org/10.1016/j.cels.2019.01.003>. 707  
708  
709  
710  
711  
712
- Ronald J W Lambert and Douglas A Dawson. individual and combined toxicants. *Toxicol. Res. (Camb)*, 2019. doi: 10.1039/c9tx00005d. 713  
714
- Powerful combination therapies. *Nat. Biomed. Eng.*, 2(8):555–556, 2018. ISSN 2157-846X. doi: 10.1038/s41551-018-0283-1. URL <https://doi.org/10.1038/s41551-018-0283-1>. 715  
716  
717
- Joseph Lehar, Grant R Zimmermann, Andrew S Krueger, Raymond A Molnar, Jedediah T Ledell, Adrian M Heilbut, Glenn F Short, Leanne C Giusti, Garry P Nolan, Omar A Magid, Margaret S Lee, Alexis A Borisy, Brent R Stockwell, and Curtis T Keith. Chemical combination effects predict connectivity in biological systems. *Mol. Syst. Biol.*, 3(80):80, 2007. ISSN 1744-4292. doi: 10.1038/msb4100116. 718  
719  
720  
721  
722

723

- 724 Ting-Chao Chou and Paul Talalay. A Simple Generalized Equation for the  
725 Analysis of Multiple Inhibitions of Michaelis-Menten Kinetic Systems. *J.*  
726 *Biol. Chem.*, 252(18):6438–6442, 1977.
- 727 M.C. Berenbaum. Synergy, additivism and antagonism in immunosuppression.  
728 *Clin. exp. Immunol.*, 28:1–18, 1977.
- 729 Michael Patrick Menden, Dennis Wang, Yuanfang Guan, Michael Mason, Bence  
730 Szalai, Krishna C Bulusu, Thomas Yu, Jaewoo Kang, Minji Jeon, Russ  
731 Wolfinger, Tin Nguyen, Mikhail Zaslavskiy, In Sock Jang, Zara Ghazoui,  
732 Mehmet Eren Ahsen, Robert Vogel, Elias Chaibub Neto, Thea Norman, Eric  
733 K Y Tang, Mathew J Garnett, Giovanni Di Veroli, Stephen Fawell, Gustavo  
734 Stolovitzky, Justin Guinney, Jonathan R Dry, and Julio Saez-Rodriguez. A  
735 cancer pharmacogenomic screen powering crowd-sourced advancement of drug  
736 combination prediction. *bioRxiv*, 2018. URL [http://biorxiv.org/content/  
737 early/2018/02/13/200451.abstract](http://biorxiv.org/content/early/2018/02/13/200451.abstract).
- 738 William H Press, Saul A Teukolsky, William T Vetterling, and Brian P Flannery.  
739 *Numerical Recipes: The Art of Scientific Computing*, volume 1. Cambridge  
740 University Press, Cambridge, 3 edition, 2007. ISBN 0521880688. doi: 10.  
741 1137/1031025.
- 742 Lesley A Mathews Griner, Rajarshi Guha, Paul Shinn, Ryan M Young,  
743 Jonathan M Keller, Dongbo Liu, Ian S Goldlust, Adam Yasgar, Crystal McK-  
744 night, Matthew B Boxer, Damien Y Duveau, Jian-Kang Jiang, Sam Michael,  
745 Tim Mierzwa, Wenwei Huang, Martin J Walsh, Bryan T Mott, Paresma Patel,  
746 William Leister, David J Maloney, Christopher A Leclair, Ganesha Rai, Ajit  
747 Jadhav, Brian D Peyser, Christopher P Austin, Scott E Martin, Anton Sime-  
748 onov, Marc Ferrer, Louis M Staudt, and Craig J Thomas. High-throughput  
749 combinatorial screening identifies drugs that cooperate with ibrutinib to kill  
750 activated B-cell-like diffuse large B-cell lymphoma cells. *Proc. Natl. Acad.*  
751 *Sci. U. S. A.*, 111(6):2349–54, 2014. ISSN 1091-6490. doi: 10.1073/pnas.  
752 1311846111. URL <http://www.pnas.org/cgi/content/long/111/6/2349>.
- 753 Alexis A Borisy, Peter J Elliott, Nicole W Hurst, Margaret S Lee, Joseph Lehar,  
754 E Roydon Price, George Serbedzija, Grant R Zimmermann, Michael A Foley,  
755 Brent R Stockwell, and Curtis T Keith. Systematic discovery of multicompo-  
756 nent therapeutics. *Proc. Natl. Acad. Sci. U. S. A.*, 100(13):7977–7982, 2003.  
757 ISSN 0027-8424. doi: 10.1073/pnas.1337088100.
- 758 L Zhang, K Yan, Y Zhang, R Huang, J Bian, C Zheng, H Sun, Z Chen, N Sun,  
759 R An, F Min, W Zhao, Y Zhuo, J You, Y Song, Z Yu, Z Liu, K Yang, H Gao,  
760 H Dai, X Zhang, J Wang, C Fu, G Pei, J Liu, S Zhang, M Goodfellow,  
761 Y Jiang, J Kuai, G Zhou, and X Chen. High-throughput synergy screening  
762 identifies microbial metabolites as combination agents for the treatment of  
763 fungal infections. *Proc. Natl. Acad. Sci. U. S. A.*, 104(11):4606–4611, 2007.  
764 ISSN 0027-8424. doi: 10.1073/pnas.0609370104. URL [http://www.ncbi.  
765 nlm.nih.gov/pubmed/17360571](http://www.ncbi.nlm.nih.gov/pubmed/17360571).
- 766 Maya A Farha and Eric D Brown. Chemical probes of escherichia coli un-  
767 covered through chemical-chemical interaction profiling with compounds of  
known biological activity. *Chem. Biol.*, 17(8):852–862, 2010. ISSN 10745521.

- doi: 10.1016/j.chembiol.2010.06.008. URL <http://dx.doi.org/10.1016/j.chembiol.2010.06.008>. 769  
770
- M G Kendall. A new Measure of Rank Correlation. *Biometrika*, 30(1-2):81–93, 1938. doi: 10.1093/biomet/30.1-2.81. URL <http://dx.doi.org/10.1093/biomet/30.1-2.81>. 771  
772  
773
- Aravind Subramanian, Rajiv Narayan, Steven M Corsello, David D Peck, Ted E Natoli, Xiaodong Lu, Joshua Gould, John F Davis, Andrew A Tubelli, Jacob K Asiedu, David L Lahr, Jodi E Hirschman, Zihan Liu, Melanie Donahue, Bina Julian, Mariya Khan, David Wadden, Ian C Smith, Daniel Lam, Arthur Liberzon, Courtney Toder, Mukta Bagul, Marek Orzechowski, Oana M Enache, Federica Piccioni, Sarah A Johnson, Nicholas J Lyons, Alice H Berger, Alykhan F Shamji, Angela N Brooks, Anita Vrcic, Corey Flynn, Jacqueline Rosains, David Y Takeda, Roger Hu, Desiree Davison, Justin Lamb, Kristin Ardlie, Larson Hogstrom, Peyton Greenside, Nathanael S Gray, Paul A Clemons, Serena Silver, Xiaoyun Wu, Wen Ning Zhao, Willis Read-Button, Xiaohua Wu, Stephen J Haggarty, Lucienne V Ronco, Jesse S Boehm, Stuart L Schreiber, John G Doench, Joshua A Bittker, David E Root, Bang Wong, and Todd R Golub. A Next Generation Connectivity Map: L1000 Platform and the First 1,000,000 Profiles. *Cell*, 171(6):1437–1452.e17, 2017. ISSN 10974172. doi: 10.1016/j.cell.2017.10.049. URL <http://dx.doi.org/10.1016/j.cell.2017.10.049>. 774  
775  
776  
777  
778  
779  
780  
781  
782  
783  
784  
785  
786  
787  
788  
789
- Justin Lamb, Emily D Crawford, David Peck, Joshua W Modell, Irene C Blat, Matthew J Wrobel, Jim Lerner, Jean-Philippe Brunet, Aravind Subramanian, Kenneth N Ross, Michael Reich, Haley Hieronymus, Guo Wei, Scott A Armstrong, Stephen J Haggarty, Paul A Clemons, Ru Wei, and Steven A Carr. The Connectivity Map : Using Gene-Expression Signatures to Connect Small Molecules, Genes, and Disease. *Science (80-. )*, 313(September):1929–1935, 2006. ISSN 1095-9203. doi: 10.1126/science.1132939. 790  
791  
792  
793  
794  
795  
796
- Barbara M Grüner, Christopher J Schulze, Dian Yang, Daisuke Ogasawara, Melissa M Dix, Zoë N Rogers, Chen-Hua Chuang, Christopher D McFarland, Shin-Heng Chiou, J Mark Brown, Benjamin F Cravatt, Matthew Bogyo, and Monte M Winslow. An in vivo multiplexed small-molecule screening platform. *Nat. Methods*, 13(September), 2016. ISSN 1548-7091. doi: 10.1038/nmeth.3992. URL <http://www.nature.com/doi/10.1038/nmeth.3992>. 797  
798  
799  
800  
801  
802
- D Russ and R Kishony. Additivity of inhibitory effects in multidrug combinations. *Nat. Microbiol.*, 2018. ISSN 2058-5276. doi: 10.1038/s41564-018-0252-1. URL <http://dx.doi.org/10.1038/s41564-018-0252-1>. 803  
804  
805  
806
- L Norberg and G Wahlström. Anaesthetic effects of flurazepam alone and in combination with thiopental or hexobarbital evaluated with an EEG-threshold method in male rats. *Arch. Int. Pharmacodyn. Ther.*, 292:45–57, 1988. 807  
808  
809  
810
- Simone Lederer, Tjeerd M H Dijkstra, and Tom Heskes. Additive Dose Response Models: Defining Synergy. *bioRxiv*, 2018b. doi: 10.1101/480608. URL <https://www.biorxiv.org/content/early/2018/11/29/480608>. 811  
812

- 814 A V Hill. The possible effects of the aggregation of the molecule of hemoglobin  
815 on its dissociation curves. *J. Physiol.*, 40:iv–vii, 1910.
- 816 Sylvain Goutelle, Michel Maurin, Florent Rougier, Xavier Barbaut, Laurent  
817 Bourguignon, Michel Ducher, and Pascal Maire. The Hill equation: A review  
818 of its capabilities in pharmacological modelling. *Fundam. Clin. Pharmacol.*,  
819 22(6):633–648, 2008. ISSN 07673981. doi: 10.1111/j.1472-8206.2008.00633.x.
- 820 Christian Ritz and Jens C Streibig. *drc: Analysis of Dose-Response Curves*,  
821 2016. URL <https://cran.r-project.org/package=drc>.
- 822 Simon Wood. *Generalized Additive Models: an introduction with R*. Chapman  
823 and Hall/CRC, 2 edition, 2017. ISBN 1584884746. doi: 10.1111/j.1541-0420.  
824 2006.00574.x.
- 825 Simon N Wood. Fast stable restricted maximum likelihood and marginal likeli-  
826 hood estimation of semiparametric generalized linear models. *J. R. Stat. Soc.*,  
827 73(1):3–36, 2011. ISSN 13697412. doi: 10.1111/j.1467-9868.2010.00749.x.
- 828 Christian Ritz, Florent Baty, Jens C Streibig, and Daniel Gerhard. Dose-  
829 response analysis using R. *PLoS One*, 10(12):1–13, 2015. ISSN 19326203. doi:  
830 10.1371/journal.pone.0146021. URL [http://journals.plos.org/plosone/  
831 article?id=10.1371/journal.pone.0146021](http://journals.plos.org/plosone/article?id=10.1371/journal.pone.0146021).
- 832 R Core Team. *R: A Language and Environment for Statistical Computing*. R  
833 Foundation for Statistical Computing, Vienna, Austria, 2016. URL [https:  
834 //www.r-project.org/](https://www.r-project.org/).
- 835 Takaya Saito and Marc Rehmsmeier. The precision-recall plot is more in-  
836 formative than the ROC plot when evaluating binary classifiers on im-  
837 balanced datasets. *PLoS One*, 10(3):1–21, 2015. ISSN 19326203. doi:  
10.1371/journal.pone.0118432.

838

839 **Tables**

|                | synergistic | antagonistic | non-interactive |
|----------------|-------------|--------------|-----------------|
| Mathews Griner | 121         | 90           | 252             |
| Cokol          | 50          | 68           | 82              |

Table 1: Number of cases categorized as synergistic, antagonistic or non-interactive in the two datasets Mathews Griner and Cokol.

840 **Figure Captions**

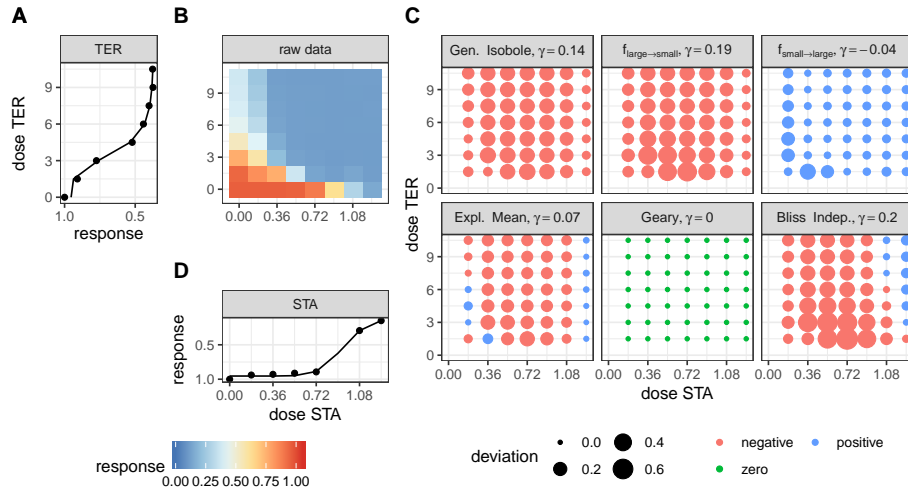

Figure 1: Description of the analysis steps of the lack-of-fit method for the compound pair TER and STA from the Cokol dataset. This compound pair is categorized as synergistic according to [Cokol et al., 2011]. The raw response data of the record is depicted in (B). The response data normalized by the read at zero dose concentration (lower left). In (B) the degree of relative cell growth is colored from high to low values in red to blue.

Step 1: compute Hill curves for conditional responses: Based on the raw reads of the single dose responses (lower and left outer edges) fit a Hill curve to the conditional responses. The fitted Hill curves shown in (A) and (D) with original raw data shown as points.

Step 2: compute expected non-interactive response for all six models: not shown.

Step 3: compute difference between measured data (C) and expected data from all six null reference models: shown in (C). The direction of difference is shown by color (red for negative and blue for positive, green for zero). The larger the degree of difference, the larger the bullet, and vice versa.

Step 4: compute integral  $\gamma$  over the differences: Over all those bullets, we then compute the integral, which gives the synergy score  $\gamma$ . For every model, the synergy score  $\gamma$  is depicted in the title of each matrix in (C).

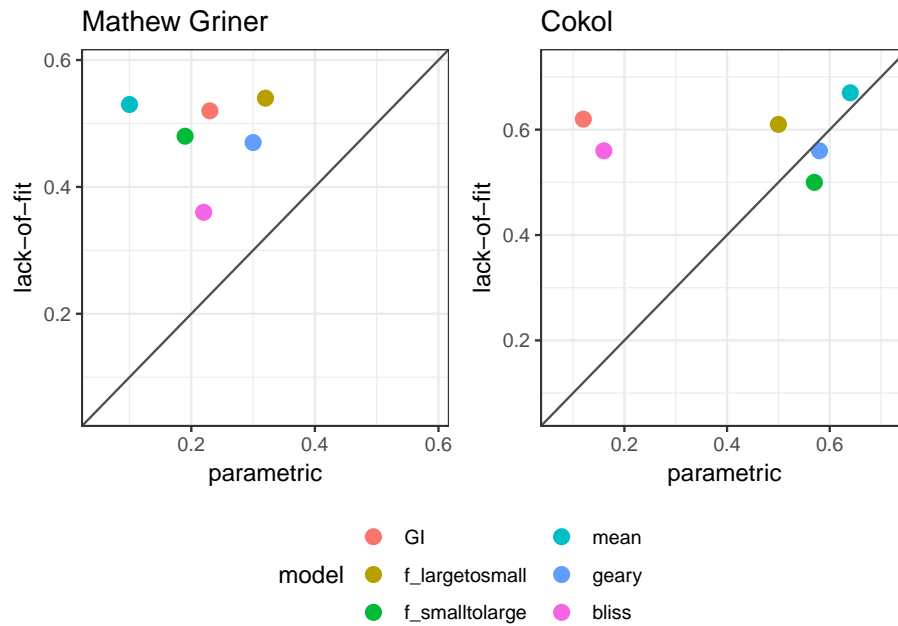

Figure 2: Scatter plot of Kendall rank correlation coefficient for both datasets, Mathews Griner (left) and Cokol (right). The Kendall correlation measures the rank correlation of the original categorization and the computed synergy scores. The higher the correlation, the more similar the score ranking. The correlation values from the synergy scores  $\alpha$ , computed with the parametric approach, are plotted on the  $x$ -axis and those from the lack-of-fit approach are plotted on the  $y$ -axis. Each model is depicted in a different color. To guide the eye, the diagonal is plotted. If a data point is above the diagonal, the Kendall rank correlation coefficient from the lack-of-fit method is higher than that from the parametric method, and vice versa. Without exception, the Kendall rank correlation coefficients are all higher for the synergy scores  $\gamma$ , which are computed with the lack-of-fit method, than those based on the  $\alpha$  scores computed with the parametric method.

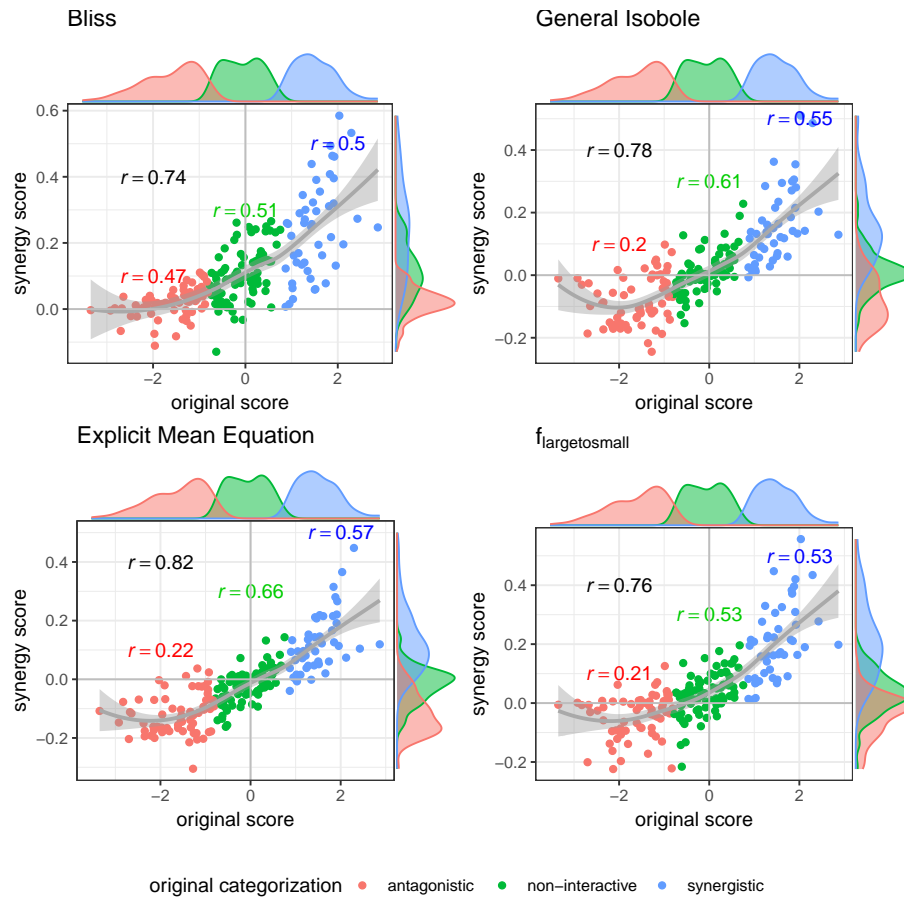

Figure 3: Computed synergy scores  $\gamma$  of Cokol data of the best models according to the Kendall rank correlation coefficient and ROC analysis in Section 3.1 and Appendix C in comparison to the original scores from Cokol et al. [2011]. The data points are colored based on the original categorization. For all three categories, synergistic, non-interactive and antagonistic, the Pearson correlation is depicted between the original scores in that category and the computed synergy scores in the respective color. Additionally, we depict the local polynomial regression fitting of all scores (in gray). The histograms of the scores are plotted on the axis, separated by color based on the original categorization. Synergy scores  $\gamma$  based on the Explicit Mean Equation model show the highest correlation with the original scores.



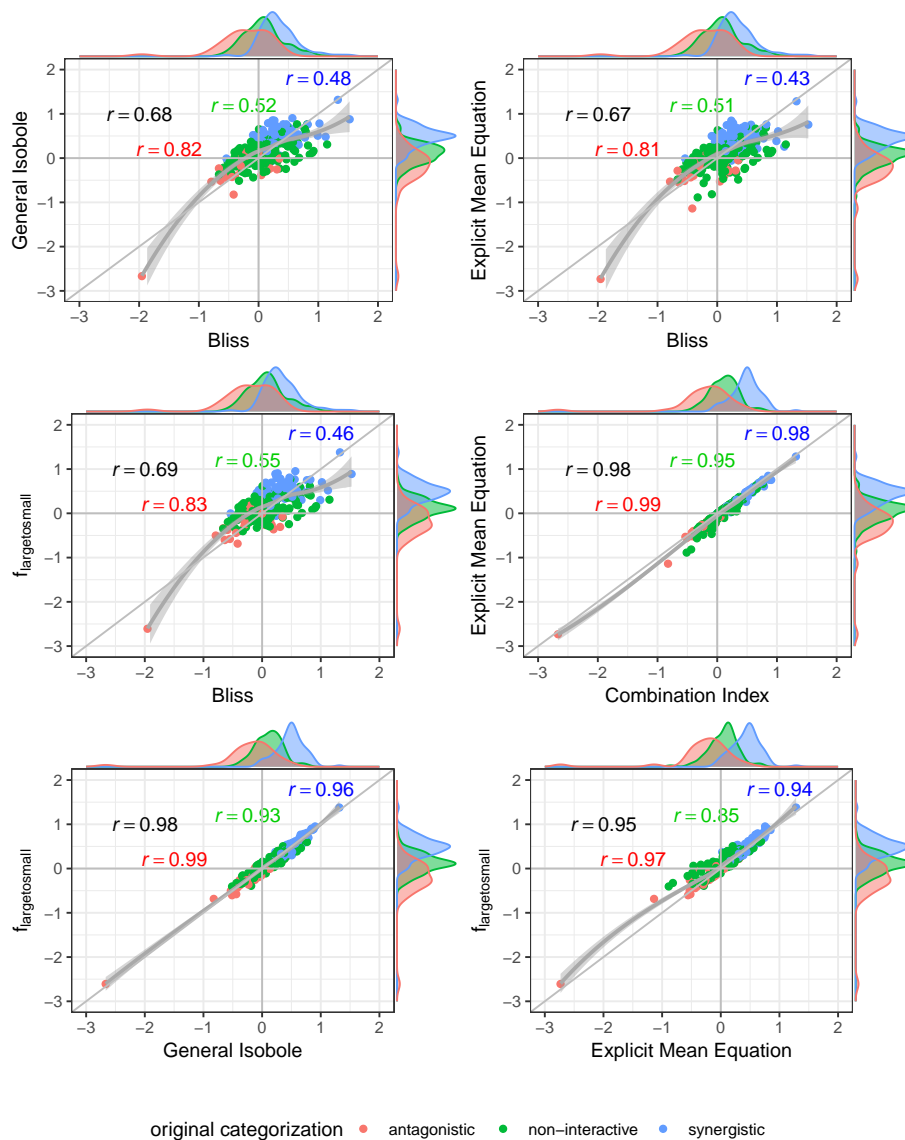

Figure 4: Scatter plot of synergy scores  $\gamma$  of the Mathews Griner dataset. The scores are computed with the lack-of-fit method. Displayed are the four best models according to the Kendall rank correlation coefficient and ROC analysis in Section 3.1 and Appendix C. The scores of one model are depicted on the  $x$ -axis and the other on the  $y$ -axis. The original categorization is given based on colour. The Pearson correlation score between the synergy scores are depicted by color for every categorization and the overall Pearson correlation is depicted in black. To guide the eye, the axis at 0, the diagonal and local polynomial regression fitting are depicted in grey. The histograms of the scores are plotted on the axis, separated by color based on the original categorization. The three models based on the Loewe Additivity principle show highest correlation (center right and lower row). All comparison with  $f_{\text{bliss}}(x_1, x_2)$  show lowest correlation (first three cases). There is a large difference between the correlation between the additive models and the comparison of Bliss Independence by roughly 0.3.

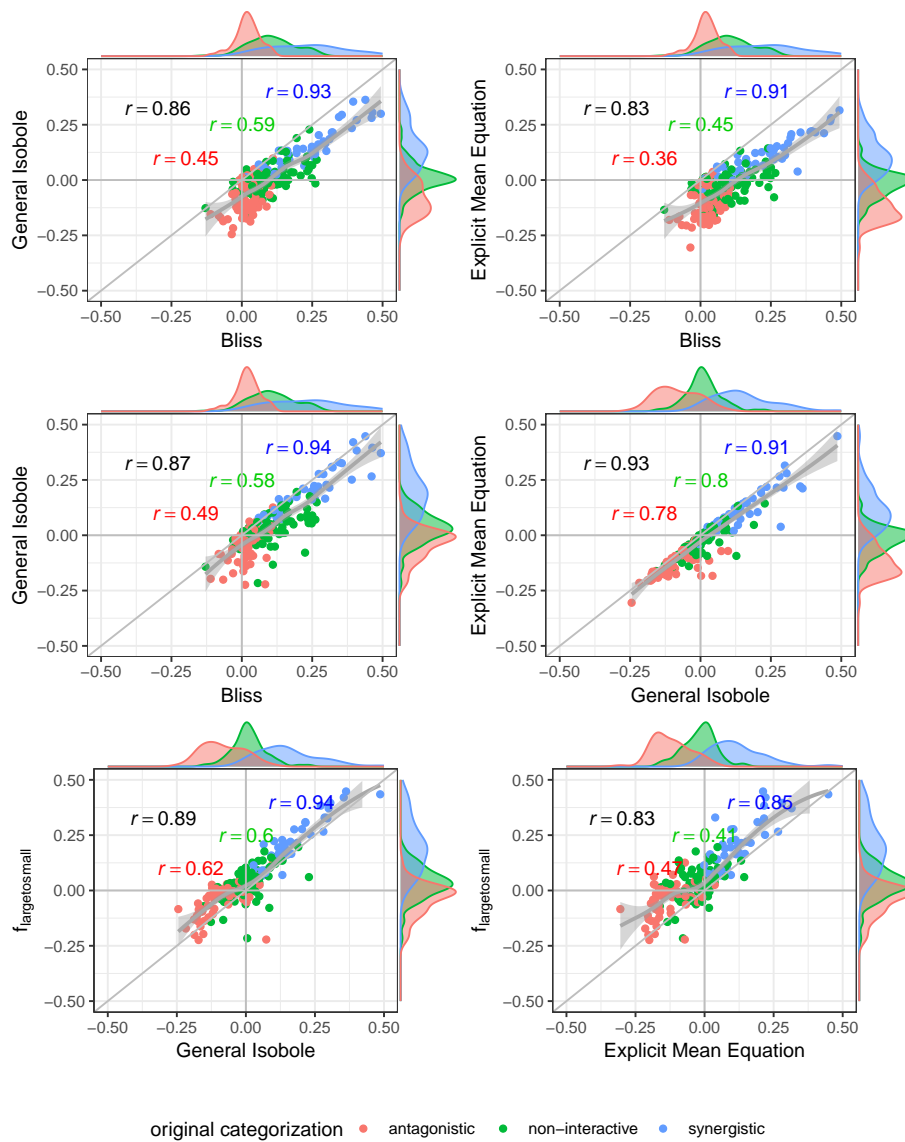

Figure 5: Scatter plot of synergy scores  $\gamma$  of the Cokol dataset. The scores are computed with the lack-of-fit method. Displayed are the four best models according to the Kendall rank correlation coefficient and ROC analysis in Section 3.1 and Appendix C. The scores of one model are depicted on the  $x$ -axis and the other on the  $y$ -axis. The original categorization is given based on colour. The Pearson correlation score between the synergy scores are depicted by color for every categorization and the overall Pearson correlation is depicted in black. To guide the eye, the axis at 0, the diagonal and the local polynomial regression fitting are depicted in grey. The histograms of the scores are plotted on the axis, separated by color based on the original categorization.  $f_{\text{mean}}(x_1, x_2)$  and  $f_{\text{GI}}(x_1, x_2)$  show highest correlation (center right),  $f_{\text{bliss}}(x_1, x_2)$  shows lowest (first three comparison cases).

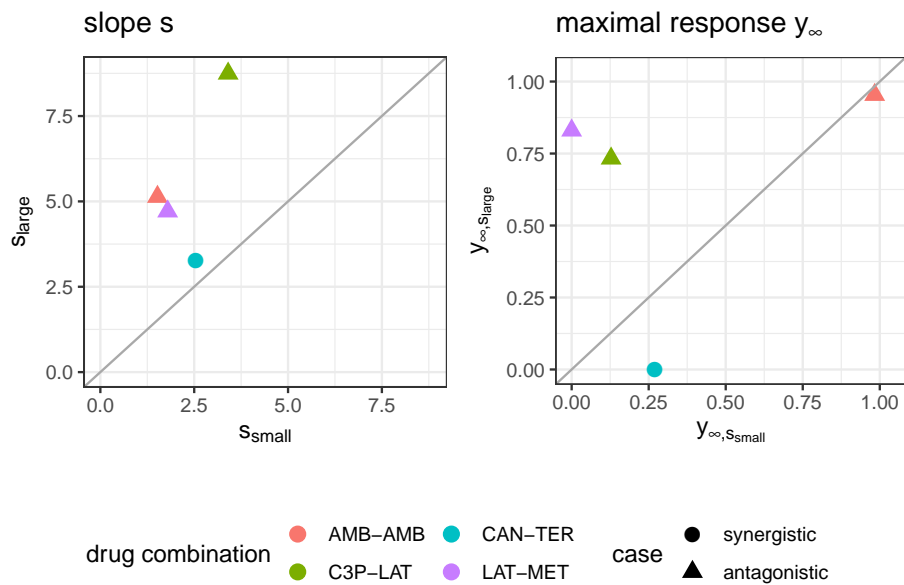

Figure 6: Maximal response  $y_{\infty}$  (left) and slope parameters  $s$  (right) of Hill curves. Parameters are shown for the conditional responses of the four cases for which the lack-of-fit method resulted for  $f_{\text{mean}}(x_1, x_2)$  and  $f_{\text{GI}}(x_1, x_2)$  in a synergy score of opposite sign to its categorization from the Cokol dataset. Different records are depicted in different colours. The original categorization of each record is depicted per shape. The conditional responses of one record, and hence their Hill curve parameters, are grouped depending on size of the Hill curve parameter  $s$  (larger or smaller).

## 841 A Conditional Dose Response Curves

842 A common approach for modeling monotonic dose-response curves  $f_j$  with  $j \in$   
 843  $\{1, 2\}$  is the Hill curve [Hill, 1910], also referred to as the sigmoid function. The  
 844 Hill model is, due to its good fit to many sources of data, the most widely applied  
 845 model for fitting compound responses [Goutelle et al., 2008]. It has a sigmoidal  
 846 shape with little change for small doses but with a rapid decline in response  
 847 once a certain threshold is met. For even larger doses the effect asymptotes to  
 848 a constant maximal effect. Two exemplary Hill curves are depicted in Fig. 7.  
 There are several parameterizations of the Hill curve. We use the following

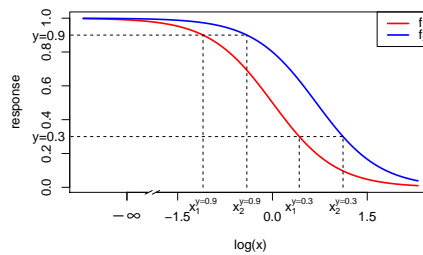

Figure 7: Dose-response curves (red and blue) as Hill curves (Eq. 21). For the exemplary responses of 0.3 and 0.9 the different doses  $x_1$  and  $x_2$  reaching that effect are shown (dashed lines). The dose-response curves differ only in  $EC_{50}$  with  $e_1 = 2$  and  $e_2 = 1$ . Values of the other parameters are  $y_0 = 1$ ,  $y_\infty = 0$  and  $s = 2$ . To highlight the sigmoidal shape of a Hill curve in log-space, the logarithmic concentration space is depicted.

849 throughout this study to fit conditional responses:

$$851 \quad f(x) = y_\infty + \frac{y_0 - y_\infty}{1 + \left(\frac{x}{e}\right)^s}, \quad (21)$$

852 where  $y_0$  is the response at zero dose and  $y_\infty$  the maximal response of the cells to  
 853 the compound,  $e$  the dose concentration reaching half of the maximal response  
 854 and  $s$  the steepness of the curve. Eq. 21 is equivalent to the parametrization  
 855 used in the drc package [Ritz and Strebig, 2016], the so-called four parameter  
 856 log-logistic model. By our definition of the Hill curve, a positive  $s$  leads to a  
 descending Hill curve.

857

## B Data Cleaning, Fitting of Hill Curve and Parameter Estimation for Implicit Models

First, we normalize all records by the measured response at zero dose concentration from both compounds,  $y_0$ . Second, we conduct an outlier analysis of the normalized responses by fitting a spline surface and deleting outliers to discard them. Third, we then fit the conditional responses of the cleaned data to Hill curves.

We fit a general additive model (GAM) to the normalized raw data using thin plate splines [Wood, 2017], not transforming the doses in any way. The surfaces of those fitted thin plate splines span the checkerboards of every record and data points with too large absolute residual values are rejected. For fitting the splines we use method `gam()` of the `mgcv`-package [Wood, 2011], defining the smooth terms within the gam formulae with the method `s()`. We set the dimension of the basis, that is used to represent the smooth term to  $k = 30$  fixed knots.

The threshold to reject data points is at five times the inter-quantile range of all residuals of a given record. Every data point with an absolute residual above that threshold is discarded. For the Mathews Griner data, this leads to 18 records out of the 466 (less than 4%) where a mean of 1.28 outliers were excluded per record with an overall of 23 data points excluded, which is less than one percent of the overall data. A maximum of 6 outliers was detected once. Similarly, we excluded on average 2.48 data points for the Cokol data on 52 of the total 200 ( $\leq 25\%$ ) records with a maximum of 13 data points and an overall of 129 data points excluded, which is about 1% of all data points.

To fit the two conditional responses of a record to two Hill functions of the form of Eq. 21 we use the `drc` package [Ritz et al., 2015]. Unlike other synergy analyses such as [Yadav et al., 2015], the response at zero concentration  $y_0$  is not fixed to 1 but merely constrained to be the same for both response curves. The other Hill parameters,  $y_\infty$ ,  $s$  and  $e$  are fitted for both compounds individually. In case the asymptote parameter  $y_\infty$  is below zero for any of the two Hill curves, the conditional response of that compound is refitted to a two-parameter model with  $y_\infty$  set to zero and  $y_0$  kept from the fitting of both compounds together. This is the case for 43 records of the Mathews Griner dataset and 125 records of the Cokol dataset. We exclude records for which any of the Hill curve parameters slope or EC50 are negative ( $s < 0, e < 0$ ). This is the case for 187 records for the Mathews Griner dataset (133 records with negative slope  $s$ , 88 records with negative EC50 value  $e$ , out of which there are 34 records with negative slope and negative EC50 value), which is roughly 40% of all records. More details follow below.

The  $f_{\text{GI}}(x_1, x_2)$  model is an implicit model for the response  $y$ . Therefore, a root finder is used to find a response  $\hat{y}^{(i)}$  given concentrations  $(x_1^{(i)}, x_2^{(i)})$  and parameters describing the Hill curves of the conditional responses,  $\Theta = \{y_0, y_{\infty, j}, e_j, s_j\}$ . We used the standard implementation of a root finder in the R stats package, `uniroot()` [R Core Team, 2016], which is based on the Brent-Dekker-van Wijngaarden algorithm [Press et al., 2007, Chapter 9]. As convergence criterion we used  $1.22 \times 10^{-4}$  within a maximum of 1000 iterations.

## 904 B.1 Sensitivity of model performance to inter-quantile range

905 In a previous version of this article, we cleaned the data to three times the  
906 inter-quantile range instead of five. With this smaller inter-quantile range we  
907 removed in the Mathews Griner dataset in total 199 data points instead of 23,  
908 and in the Cokol dataset 623 instead of 129. The performance of the Mathews  
909 Griner dataset for the lack-of-fit method slightly decreased, whereas the overall  
910 performance for the Cokol dataset increased (see Appendix E, Fig. 8 and Fig. 9).

911 As a note, approximately the same number of records were excluded for the  
912 analysis due to two issues: i) negative slopes of at least one of the conditional  
913 dose response curves, or ii) the root-finder for the  $f_{\text{CI}}(x_1, x_2|\alpha)$  model not con-  
914 verging (no convergence after 1000 iterations). These issues are independent  
915 from data cleaning with three or five times the inter-quantile range (see Ap-  
916 pendix D, Table 13 - Table 16).

## 917 B.2 Handling records with negative slope or EC50 values

918 Roughly 40% (187) of the records of the Mathews Griner dataset were excluded  
919 in the study because of a negative slope or EC50 parameter. This is due to a  
920 suboptimal choice of doses. We observed two types of sub-optimality: first, the  
921 maximal dose can be too small to induce a significant change in response. Due  
922 to the noise in measurements, negative slope and EC50 parameters are fitted.  
923 This is the case for 34 records. A second type of sub-optimality is observed  
924 when the maximal effect is already reached for the second dose (the first dose  
925 is always zero). This is the case for the remaining 153 records.

926 Although we could not fit two reasonable Hill curves to these records, we can  
927 still use both methods, lack-of-fit and parametric, to quantify synergy. They  
928 both only require two mathematically well-defined conditional response curves.  
929 Here, we define a conditional response for cases with negative slope or negative  
930 EC50 parameter according to Table 2.

| $s$   | $e$   | $y(x)$                      |
|-------|-------|-----------------------------|
| $< 0$ | $< 0$ | $y_0 \quad \forall \quad x$ |
| $< 0$ | $> 0$ | $y_\infty$ for $x \neq 0$   |
| $> 0$ | $< 0$ | $y_\infty$ for $x \neq 0$   |

Table 2: Response curves for cases where the Hill model fit leads to negative slope or negative EC50 values.

931 With the above definition for conditional response curves, we investigated the  
932 187 previously excluded records in detail. We computed the lack-of-fit synergy  
933 values  $\gamma$  for those 187 records and for the entire dataset of 466 records. For  
934 two of these records, the  $f_{\text{GI}}(x_1, x_2)$  model did not converge. The Kendall rank  
935 correlation coefficient values are given in Appendix D, Table 17. The inclusion  
936 of those datasets results in lower Kendall rank correlation coefficients relative to  
937 the original analysis. The coefficients decrease by roughly 0.05 when averaged  
over all models.

938

## C ROC-analysis

939

In high-throughput synergy studies, one generally screens for promising candidates that exhibit a synergistic or antagonistic effect. Those promising candidates are then investigated in more detail with genetic assays and other techniques. To determine how well the underlying null reference models result in distinguishable synergy scores, we conduct an ROC analysis (receiver operating characteristic), comparing the estimated synergy scores with the class categorization that is given for both datasets. A standard ROC analysis applies to binary classification, where cases are compared to controls. In this study, we have three classes: synergistic, antagonistic and non-interactive. We therefore compare each class to the combination of the other two, e.g. synergistic as cases versus the antagonistic and non-interactive combined as control. Typically, in ROC analyses, the cases rank higher than the controls. When treating the class antagonistic as case compared to the control synergistic and non-interactive we change all signs of the synergy scores. Therefore, the ranking of synergy scores is reversed and antagonistic synergy scores rank higher. Problems arise when comparing non-interactive cases to the control synergistic and antagonistic as their values should lie between the two control classes. Therefore, the absolute value of the estimated synergy scores is taken, which allows a ranking where the synergy scores of the non-interactive records should rank lower than the other synergy scores. Additionally, we can again multiply all synergy scores with minus one to revert the order of scores such that the cases rank higher.

940  
941  
942  
943  
944  
945  
946  
947  
948  
949  
950  
951  
952  
953  
954  
955  
956  
957  
958  
959  
960

The AUC values (area under the curve) are reported in Table 5 - Table 8 in Appendix D. For completeness, and based on the critique of Saito and Rehmsmeier [2015] to use PRC-AUC (precision/recall area under the curve) values for imbalanced datasets, the PRC-AUC values are also computed and can be found in Table 9 - Table 12 in Appendix D.

961  
962  
963  
964  
965

Analogously to the previous section, we depict the AUC values for both datasets in scatter plots (Fig. 10) with AUC values based on the parametric approach depicted on the  $x$ -axis and those based on the lack-of-fit approach on the  $y$ -axis. The underlying null reference models are shown by color. The different comparisons, such as synergistic versus non-interactive and antagonistic, are depicted by shape of the plot symbol.

966  
967  
968  
969  
970  
971

From Fig. 10, the dominance of the lack-of-fit approach over the parametric one is as apparent for the Mathews Griner dataset as from Fig. 2. With regard to the comparison of the different cases, visualized in shape, the AUC values from the comparison of the synergistic cases to the non-interactive and antagonistic controls, score the highest values around 0.9. The comparison of the non-interactive cases to the interactive ones score the lowest.

972  
973  
974  
975  
976  
977

As the overall highest AUC scores result from the lack-of-fit method, we have a closer look at those for both datasets (Table 6 and Table 8 in Appendix D). For the antagonistic case, the values range around 0.80 for the Mathews Griner dataset and around 0.85 for the Cokol dataset. AUC values of the non-interactive case range around 0.75 for both datasets. The AUC values for the synergistic case for both datasets range around a value of 0.90 with one outlier of 0.75 for the Bliss Independence model on the Mathews Griner dataset.

978  
979  
980  
981  
982  
983  
984

Overall, the lack-of-fit outperforms the parametric method on the Mathews Griner dataset. For the lack-of-fit method, both the  $f_{\text{large} \rightarrow \text{small}}(x_1, x_2)$  and Explicit Mean Equation perform best on the Mathews Griner dataset for syner-

985  
986

987

988 gistic cases, and a clear dominance of  $f_{\text{large} \rightarrow \text{small}}(x_1, x_2)$  over the Explicit Mean  
989 Equation for antagonistic and non-interactive cases. On the second dataset, the  
990 Cokol dataset, Explicit Mean Equation performs overall best for both methods.

991 We attribute the differences in performances of methods and models on the  
992 two datasets to the differences in the experimental design for these datasets. For  
993 the Cokol dataset, all compounds were applied up to their maximal effect dose.  
994 In the Mathews Griner dataset, all compounds were applied with the same fixed  
dose range.

995



## D Supplementary Tables

996

| model                                                 | lack-of-fit | parametric  |
|-------------------------------------------------------|-------------|-------------|
| $f_{\text{GI}}(x_1, x_2)$                             | 0.52        | 0.23        |
| $f_{\text{large} \rightarrow \text{small}}(x_1, x_2)$ | <b>0.54</b> | <b>0.32</b> |
| $f_{\text{small} \rightarrow \text{large}}(x_1, x_2)$ | 0.48        | 0.19        |
| $f_{\text{mean}}(x_1, x_2)$                           | 0.53        | 0.10        |
| $f_{\text{geary}}(x_1, x_2)$                          | 0.47        | 0.30        |
| $f_{\text{bliss}}(x_1, x_2)$                          | 0.36        | 0.22        |

Table 3: Kendall rank correlation coefficient of Mathews Griner data set.

| model                                                 | lack-of-fit | parametric  |
|-------------------------------------------------------|-------------|-------------|
| $f_{\text{GI}}(x_1, x_2)$                             | 0.62        | 0.12        |
| $f_{\text{large} \rightarrow \text{small}}(x_1, x_2)$ | 0.61        | 0.50        |
| $f_{\text{small} \rightarrow \text{large}}(x_1, x_2)$ | 0.50        | 0.57        |
| $f_{\text{mean}}(x_1, x_2)$                           | <b>0.67</b> | <b>0.64</b> |
| $f_{\text{geary}}(x_1, x_2)$                          | 0.56        | 0.58        |
| $f_{\text{bliss}}(x_1, x_2)$                          | 0.56        | 0.16        |

Table 4: Kendall rank correlation coefficient of Cokol data set.

|                                                       | synergistic | non-interactive | antagonistic |
|-------------------------------------------------------|-------------|-----------------|--------------|
| $f_{\text{GI}}(x_1, x_2)$                             | 0.67        | 0.63            | 0.62         |
| $f_{\text{large} \rightarrow \text{small}}(x_1, x_2)$ | <b>0.73</b> | <b>0.68</b>     | <b>0.72</b>  |
| $f_{\text{small} \rightarrow \text{large}}(x_1, x_2)$ | 0.68        | 0.53            | 0.53         |
| $f_{\text{mean}}(x_1, x_2)$                           | 0.62        | <b>0.68</b>     | 0.46         |
| $f_{\text{geary}}(x_1, x_2)$                          | 0.70        | 0.57            | 0.60         |
| $f_{\text{bliss}}(x_1, x_2)$                          | 0.66        | 0.45            | 0.62         |

Table 5: AUC analysis of parametric method applied to Mathews Griner dataset.

|                                         | synergistic | non-interactive | antagonistic |
|-----------------------------------------|-------------|-----------------|--------------|
| $f_{GI}(x_1, x_2)$                      | 0.88        | 0.77            | 0.81         |
| $f_{large \rightarrow small}(x_1, x_2)$ | <b>0.89</b> | <b>0.78</b>     | <b>0.84</b>  |
| $f_{small \rightarrow large}(x_1, x_2)$ | 0.86        | 0.68            | 0.78         |
| $f_{mean}(x_1, x_2)$                    | <b>0.89</b> | 0.75            | 0.82         |
| $f_{geary}(x_1, x_2)$                   | 0.85        | 0.69            | 0.78         |
| $f_{bliss}(x_1, x_2)$                   | 0.75        | 0.60            | 0.76         |

Table 6: AUC analysis on lack-of-fit method applied to Mathews Griner dataset.

|                                         | synergistic | non-interactive | antagonistic |
|-----------------------------------------|-------------|-----------------|--------------|
| $f_{GI}(x_1, x_2)$                      | 0.62        | 0.62            | 0.55         |
| $f_{large \rightarrow small}(x_1, x_2)$ | 0.80        | 0.64            | 0.84         |
| $f_{small \rightarrow large}(x_1, x_2)$ | 0.86        | 0.64            | 0.89         |
| $f_{mean}(x_1, x_2)$                    | <b>0.89</b> | <b>0.74</b>     | <b>0.93</b>  |
| $f_{geary}(x_1, x_2)$                   | 0.80        | <b>0.74</b>     | 0.89         |
| $f_{bliss}(x_1, x_2)$                   | 0.62        | 0.55            | 0.59         |

Table 7: AUC analysis on parametric method applied to Cokol dataset.

|                                         | synergistic | non-interactive | antagonistic |
|-----------------------------------------|-------------|-----------------|--------------|
| $f_{GI}(x_1, x_2)$                      | 0.93        | 0.78            | 0.88         |
| $f_{large \rightarrow small}(x_1, x_2)$ | 0.94        | 0.63            | 0.86         |
| $f_{small \rightarrow large}(x_1, x_2)$ | 0.83        | 0.66            | 0.83         |
| $f_{mean}(x_1, x_2)$                    | <b>0.95</b> | <b>0.80</b>     | <b>0.91</b>  |
| $f_{geary}(x_1, x_2)$                   | 0.88        | 0.71            | 0.86         |
| $f_{bliss}(x_1, x_2)$                   | 0.86        | 0.43            | 0.87         |

Table 8: AUC analysis on lack-of-fit method applied to Cokol dataset.

|                                         | synergistic | non-interactive | antagonistic |
|-----------------------------------------|-------------|-----------------|--------------|
| $f_{GI}(x_1, x_2)$                      | 0.39        | 0.69            | <b>0.35</b>  |
| $f_{large \rightarrow small}(x_1, x_2)$ | <b>0.62</b> | 0.73            | 0.32         |
| $f_{small \rightarrow large}(x_1, x_2)$ | 0.52        | 0.58            | 0.13         |
| $f_{mean}(x_1, x_2)$                    | 0.56        | <b>0.74</b>     | 0.18         |
| $f_{geary}(x_1, x_2)$                   | 0.61        | 0.61            | 0.15         |
| $f_{bliss}(x_1, x_2)$                   | 0.39        | 0.55            | 0.17         |

Table 9: PRC-AUC analysis on parametric method applied to Mathews Griner dataset.

|                                         | synergistic | non-interactive | antagonistic |
|-----------------------------------------|-------------|-----------------|--------------|
| $f_{GI}(x_1, x_2)$                      | 0.78        | 0.75            | 0.48         |
| $f_{large \rightarrow small}(x_1, x_2)$ | <b>0.80</b> | 0.74            | <b>0.55</b>  |
| $f_{small \rightarrow large}(x_1, x_2)$ | 0.72        | 0.69            | 0.33         |
| $f_{mean}(x_1, x_2)$                    | 0.78        | <b>0.76</b>     | 0.42         |
| $f_{geary}(x_1, x_2)$                   | 0.71        | 0.70            | 0.35         |
| $f_{bliss}(x_1, x_2)$                   | 0.52        | 0.64            | 0.39         |

Table 10: PRC-AUC analysis on lack-of-fit method applied to Mathews Griner dataset.

|                                         | synergistic | non-interactive | antagonistic |
|-----------------------------------------|-------------|-----------------|--------------|
| $f_{GI}(x_1, x_2)$                      | 0.30        | 0.57            | 0.51         |
| $f_{large \rightarrow small}(x_1, x_2)$ | 0.56        | 0.56            | 0.65         |
| $f_{small \rightarrow large}(x_1, x_2)$ | 0.62        | 0.52            | 0.83         |
| $f_{mean}(x_1, x_2)$                    | <b>0.71</b> | 0.55            | <b>0.89</b>  |
| $f_{geary}(x_1, x_2)$                   | 0.60        | <b>0.58</b>     | 0.82         |
| $f_{bliss}(x_1, x_2)$                   | 0.30        | 0.45            | 0.50         |

Table 11: PRC-AUC analysis on parametric method applied to Cokol dataset.

|                                         | synergistic | non-interactive | antagonistic |
|-----------------------------------------|-------------|-----------------|--------------|
| $f_{GI}(x_1, x_2)$                      | 0.84        | 0.65            | 0.83         |
| $f_{large \rightarrow small}(x_1, x_2)$ | <b>0.87</b> | 0.46            | 0.72         |
| $f_{small \rightarrow large}(x_1, x_2)$ | 0.63        | 0.56            | 0.72         |
| $f_{mean}(x_1, x_2)$                    | <b>0.87</b> | <b>0.66</b>     | <b>0.86</b>  |
| $f_{geary}(x_1, x_2)$                   | 0.75        | 0.60            | 0.77         |
| $f_{bliss}(x_1, x_2)$                   | 0.76        | 0.35            | 0.70         |

Table 12: PRC-AUC analysis on lack-of-fit method applied to Cokol dataset.

|             | synergistic | antagonistic | non-interactive | total |
|-------------|-------------|--------------|-----------------|-------|
| parametric  | 19          | 15           | 48              | 82    |
| lack-of-fit | 34          | 59           | 93              | 186   |
| both        | 19          | 16           | 49              | 84    |

Table 13: # of excluded records from parametric and lack-of-fit method applied to the Mathews Griner dataset with a threshold of three times the inter-quantile range.

|             | synergistic | antagonistic | non-interactive | total |
|-------------|-------------|--------------|-----------------|-------|
| parametric  | 21          | 16           | 49              | 86    |
| lack-of-fit | 36          | 58           | 91              | 185   |
| both        | 21          | 16           | 49              | 86    |

Table 14: # of excluded records from the parametric and lack-of-fit method applied to the Mathews Griner dataset with cleaned data of a threshold of five times the inter-quantile range.

|             | synergistic | antagonistic | non-interactive | total |
|-------------|-------------|--------------|-----------------|-------|
| parametric  | 6           | 4            | 6               | 16    |
| lack-of-fit | 7           | 5            | 7               | 19    |
| both        | 6           | 4            | 6               | 16    |

Table 15: # of excluded records from parametric and lack-of-fit method applied to the Cokol dataset with cleaned data of a threshold of three times the inter-quantile range.

|             | synergistic | antagonistic | non-interactive | total |
|-------------|-------------|--------------|-----------------|-------|
| parametric  | 3           | 2            | 4               | 9     |
| lack-of-fit | 3           | 3            | 4               | 10    |
| both        | 3           | 2            | 4               | 9     |

Table 16: # of excluded records from parametric and lack-of-fit method applied to Cokol dataset with cleaned data of a threshold of five times the inter-quantile range.

| model                                   | subset of<br>185 records | entire set of<br>464 records | original analysis on<br>279 records |
|-----------------------------------------|--------------------------|------------------------------|-------------------------------------|
| $f_{GI}(x_1, x_2)$                      | 0.37                     | <b>0.47</b>                  | 0.52                                |
| $f_{large \rightarrow small}(x_1, x_2)$ | 0.34                     | 0.43                         | <b>0.54</b>                         |
| $f_{small \rightarrow large}(x_1, x_2)$ | <b>0.42</b>              | 0.46                         | 0.48                                |
| $f_{mean}(x_1, x_2)$                    | 0.37                     | 0.43                         | 0.53                                |
| $f_{geary}(x_1, x_2)$                   | 0.35                     | 0.39                         | 0.47                                |
| $f_{bliss}(x_1, x_2)$                   | 0.27                     | 0.34                         | 0.36                                |

Table 17: Kendall rank correlation coefficients with recomputed conditional response curves according to Table 2 on 185 records with negative slope or EC50 value (left) and on entire dataset with 464 records (right).

## E Supplementary Figures

997

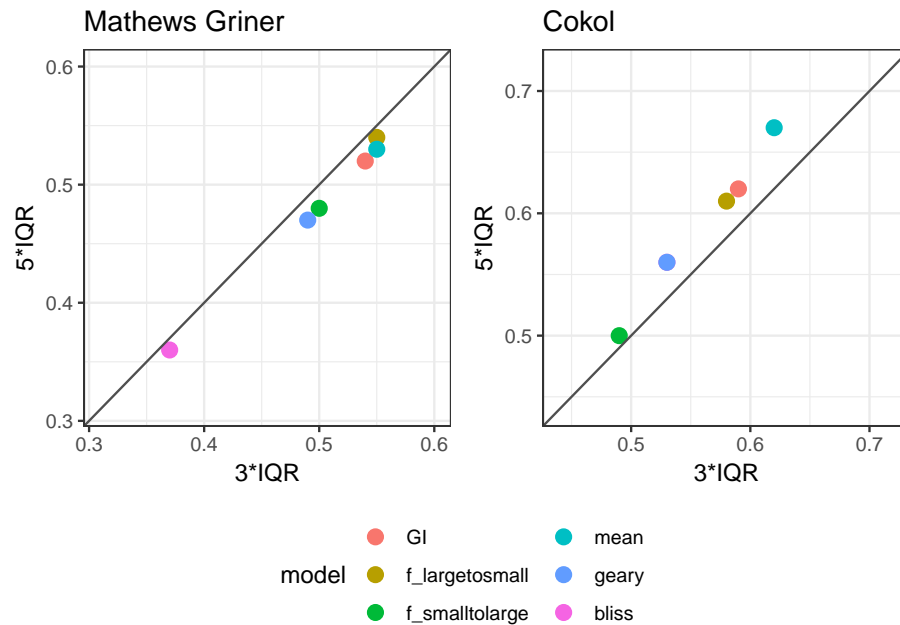

Figure 8: Scatter plot of Kendall rank correlation coefficient for both datasets, Mathews Griner (left) and Cokol (right), comparing the performance of the lack-of-fit method for different data-cleaning thresholds. The Kendall rank correlation coefficient values resulting from the cleaned data with three times the inter-quantile range are plotted on the  $x$ -axis and those from the data cleaned with a threshold of five times inter-quantile range are plotted on the  $y$ -axis. Each model is depicted in a different colour. To guide the eye, the diagonal is plotted.

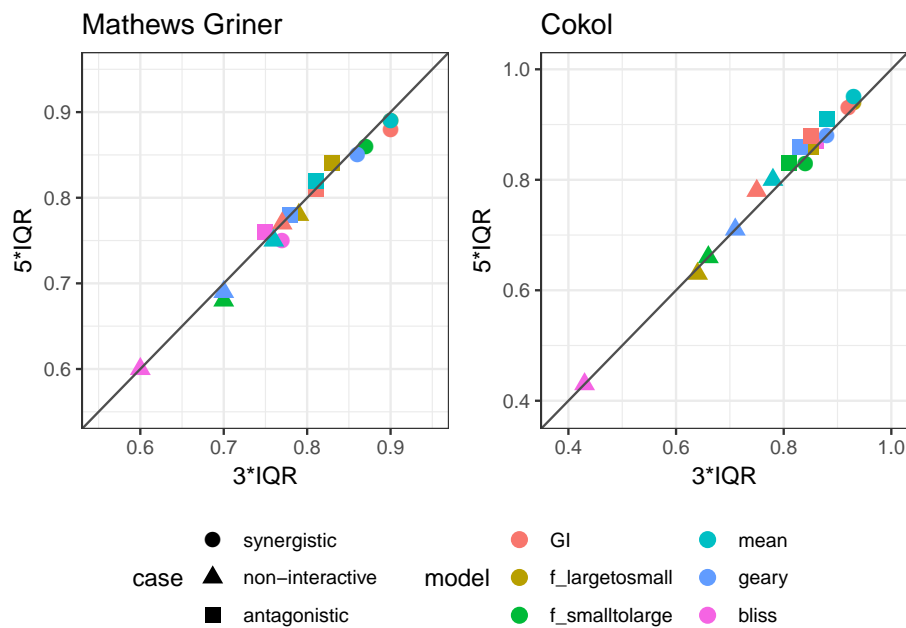

Figure 9: Scatter plot of ROC analysis for both datasets, Mathews Griner (left) and Cokol (right), comparing the performance of the lack-of-fit method for different data-cleaning thresholds. The AUC values resulting from the cleaned data with three times the inter-quantile range are plotted on the  $x$ -axis and those from the data cleaned with a five times inter-quantile range are plotted on the  $y$ -axis. AUC values from different models are shown in different colors. AUC values comparing the different categories are depicted in different shapes, where the naming of the shape represents the category that is compared to the remaining two. To guide the eye, the diagonal is plotted. The more a datapoint is above the diagonal, the better the performance of the data cleaned with a threshold of five times the inter-quantile range, and vice versa.

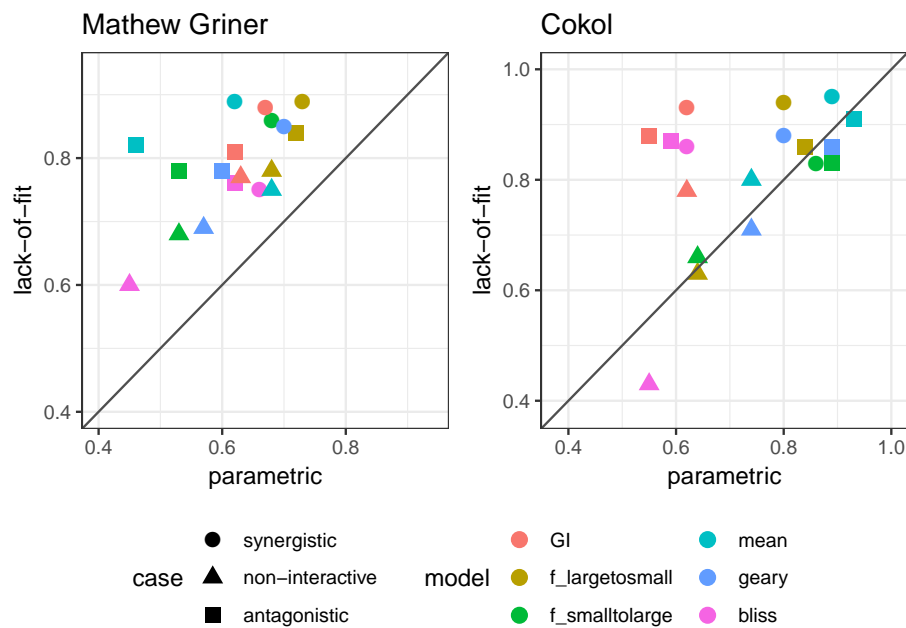

Figure 10: Scatter plot of ROC values for both datasets, Mathews Griner (left) and Cokol (right). The ROC values resulting from the parametric approach are plotted on the  $x$ -axis and those from the lack-of-fit approach are plotted on the  $y$ -axis. Each model is depicted in a different color. The three different comparisons, of one case versus the remaining two, are depicted in different shapes. To guide the eye, the diagonal is plotted. If a data point is above the diagonal, the ROC value from the lack-of-fit method is higher than that from the parametric method, and vice versa. Except for the non-interactive comparison of the Bliss Independence model, the synergy scores  $\gamma$  from the lack-of-fit method always result in higher ROC values than those computed based on the synergy scores  $\alpha$  from the parametric method.

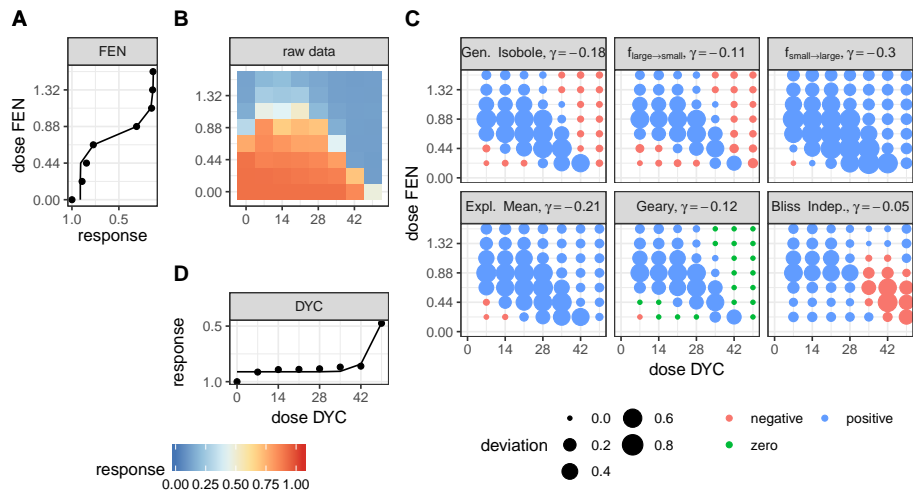

Figure 11: Description of the analysis steps of the lack-of-fit method for the compound pair FEN and DYC from the Cokol dataset. This compound pair is categorized as antagonistic according to [Cokol et al., 2011]. The raw response data of the record is depicted in (B). The response data normalized by the read at zero dose concentration (lower left). In (B) the degree of relative cell growth is colored from high to low values in red to blue.

Step 1: compute Hill curves for conditional responses: Based on the raw reads of the single dose responses (lower and left outer edges) fit a Hill curve to the conditional responses. The fitted Hill curves shown in (A) and (D) with original raw data shown as points.

Step 2: compute expected non-interactive response for all six models: not shown.

Step 3: compute difference between measured data (C) and expected data from all six null reference models: shown in (C). The direction of difference is shown by color (red for negative and blue for positive, green for zero). The larger the degree of difference, the larger the bullet, and vice versa.

Step 4: compute integral  $\gamma$  over the differences: Over all those bullets, we then compute the integral, which gives the synergy score  $\gamma$ . For every model, the synergy score  $\gamma$  is depicted in the title of each matrix in (C).



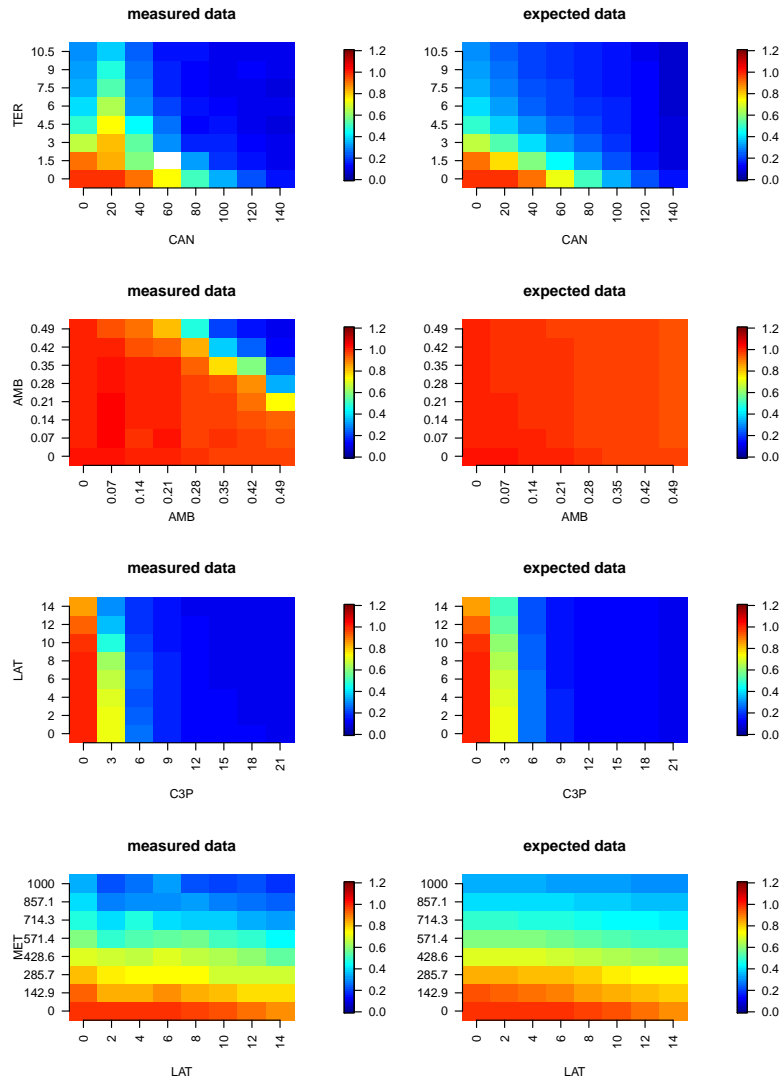

Figure 12: Raw responses (left) and expected responses from the Explicit Mean Equation model (right) of the four records from the Cokol dataset, for which the General Isobole Equation and Explicit Mean Equation gave synergy scores of opposite sign to the original categorization. More details on some parameters of the Hill curves can be found in Fig. 6.
